1 **Whole Genome Sequencing of *Plasmodium vivax* Isolates Reveals**  
2 **Frequent Sequence and Structural Polymorphisms in Erythrocyte**  
3 **Binding Genes**

4  
5 Anthony Ford<sup>1,2\*</sup>, Daniel Kepple<sup>2\*</sup>, Beka Raya Abagero<sup>3</sup>, Jordan Connors<sup>1</sup>, Richard  
6 Pearson<sup>4</sup>, Sarah Auburn<sup>5</sup>, Sisay Getachew<sup>6, 7</sup>, Colby Ford<sup>1</sup>, Karthigayan Gunalan<sup>8</sup>,  
7 Louis H. Miller<sup>8</sup>, Daniel A. Janies<sup>1</sup>, Julian C. Rayner<sup>9</sup>, Guiyun Yan<sup>10</sup>, Delenasaw  
8 Yewhalaw<sup>3</sup>, Eugenia Lo<sup>2</sup>

9 \* Co-first authors with equal contribution

10

11 <sup>1</sup> Department of Bioinformatics and Genomics, University of North Carolina at Charlotte,  
12 USA

13 <sup>2</sup> Department of Biological Sciences, University of North Carolina at Charlotte, USA

14 <sup>3</sup> Tropical Infectious Disease Research Center, Jimma University, Ethiopia

15 <sup>4</sup> Malaria Programme, Wellcome Trust Sanger Institute, Hinxton, UK

16 <sup>5</sup> Global and Tropical Health Division, Menzies School of Health Research and Charles  
17 Darwin University, Darwin, Northern Territory, Australia

18 <sup>6</sup> College of Natural Sciences, Addis Ababa University, Ethiopia

19 <sup>7</sup> Armauer Hansen Research Institute, Addis Ababa, Ethiopia

20 <sup>8</sup> Laboratory of Malaria and Vector Research, NIAID/NIH, Bethesda, USA

21 <sup>9</sup> Department of Clinical Biochemistry, Cambridge Institute for Medical Research,  
22 University of Cambridge, Cambridge CB2 OXY, UK

23 <sup>10</sup> Program in Public Health, University of California at Irvine, USA

24

25 **Correspondence:** Anthony Ford, Department of Bioinformatics and Genomics,

26 University of North Carolina at Charlotte, USA; Guiyun Yan, Program in Public Health,

27 University of California at Irvine, USA; Eugenia Lo, Department of Biological Sciences,

28 University of North Carolina at Charlotte

29

30 **Running Title:** Genomic characteristics of *Plasmodium vivax* in Ethiopia

31

32

33

34

35

36

37

38

39

40

41

42

43

## 44 **Abstract**

45 *Plasmodium vivax* malaria is much less common in Africa than the rest of the world  
46 because the parasite relies primarily on the Duffy antigen/chemokine receptor (*DARC*)  
47 to invade human erythrocytes, and the majority of Africans are Duffy negative. Recently,  
48 there has been a dramatic increase in the reporting of *P. vivax* cases in Africa, with a  
49 high number of them being in Duffy negative individuals, potentially indicating *P. vivax*  
50 has evolved an alternative invasion mechanism that can overcome Duffy negativity.  
51 Here, we analyzed single nucleotide polymorphism (SNP) and copy number variation  
52 (CNV) in Whole Genome Sequence (WGS) data from 44 *P. vivax* samples isolated from  
53 symptomatic malaria patients in southwestern Ethiopia, where both Duffy positive and  
54 Duffy negative individuals are found. A total of 236,351 SNPs were detected, of which  
55 21.9% was nonsynonymous and 78.1% was synonymous mutations. The largest  
56 number of SNPs were detected on chromosomes 9 (33,478 SNPs; 14% of total) and 10  
57 (28,133 SNPs; 11.9%). There were particularly high levels of polymorphism in  
58 erythrocyte binding gene candidates including reticulocyte binding protein 2c (*RBP2c*),  
59 merozoite surface protein 1 (*MSP1*), and merozoite surface protein 3 (*MSP3.5*,  
60 *MSP3.85* and *MSP3.9*). Thirteen genes related to immunogenicity and erythrocyte  
61 binding function were detected with significant signals of positive selection. Variation in  
62 gene copy number was also concentrated in genes involved in host-parasite  
63 interactions, including the expansion of the Duffy binding protein gene (*PvDBP*) on  
64 chromosome 6 and several *PIR* genes. Based on the phylogeny constructed from the  
65 whole genome sequences, the expansion of these genes was an independent process  
66 among the *P. vivax* lineages in Ethiopia. We further inferred transmission patterns of *P.*

67 *vivax* infections among study sites and showed various levels of gene flow at a small  
68 geographical scale. The genomic features of *P. vivax* provided baseline data for future  
69 comparison with those in Duffy-negative individuals, and allowed us to develop a panel  
70 of informative Single Nucleotide Polymorphic markers diagnostic at a micro-  
71 geographical scale.

72

73

74

75

76

77

78

79

80

81

82

83

84

85

86

87

88

## 89 **Introduction**

90 Vivax malaria is the most geographically widespread human malaria, causing over 130  
91 million clinical cases per year worldwide [1]. *Plasmodium vivax* can produce dormant  
92 liver-stage hypnozoites within infected hosts, giving rise to relapse infections from  
93 months to years. This unique feature of *P. vivax* contributes to an increase in  
94 transmission potential and increases the challenge of elimination [2]. Understanding *P.*  
95 *vivax* genome variation will advance our knowledge of parasite biology and host-  
96 parasite interactions, as well as identify potential drug resistance mechanisms [3, 4].  
97 Such data will also help identify molecular targets for vaccine development [5-7], and  
98 provide new means to track the transmission and spread of drug resistant parasites [8-  
99 9].

100        Compared to *P. falciparum*, *P. vivax* isolates from Southeast Asia (e.g., Thailand  
101 and Myanmar), Pacific Oceania (Papua New Guinea), and South America (Mexico,  
102 Peru, and Colombia) have significantly higher nucleotide diversity at the genome level  
103 [2]. This could be the result of frequent gene flow via human movement, intense  
104 transmission, and/or variation in host susceptibility [10-14]. *P. vivax* infections are also  
105 much more likely to contain multiple parasite strains in areas where transmission is  
106 intense and/or relapse is common [10, 15-18]. In Papua New Guinea, for example, *P.*  
107 *vivax* infections had an approximately 3.5-fold higher rate of polyclonality and nearly  
108 double the multiplicity of infection (MOI) than the *P. falciparum* infections [16]. Similar  
109 rates of polyclonality and MOI have also been reported in *P. vivax* in Cambodia [6]. It is  
110 possible intense transmission has sustained a large and stable parasite population in  
111 these regions [17,18]. By contrast, geographical differentiation and selection pressure

112 over generations can lead to fixation of parasite genotypes in local populations. In the  
113 Asia-Pacific region, *P. vivax* showed a high level of genetic relatedness through  
114 inbreeding among the dominant clones, in addition to strong selection imposed in a  
115 number of antimalarial drug resistance genes [19]. In Ethiopia, the chloroquine  
116 resistance transporter gene (*Pvcrt*) of *P. vivax* on chromosome 14 had been shown with  
117 significant selection in a region upstream of the promoter, highlighting the ability of *P.*  
118 *vivax* to rapidly evolve in response to control measures [20]. Apart from mutations, high  
119 copy number observed in *Pvcrt* and multidrug resistant gene (*Pvmdr1*) has also been  
120 shown to be associated with increased antimalaria drug resistance [21,22].

121         Recent genomic studies have indicated that some highly polymorphic genes in  
122 the *P. vivax* genome are associated with red blood cell invasion and immune evasion  
123 [10, 12, 19, 23]. They include the merozoite surface protein genes *MSP1*  
124 (*PVP01\_0728900*) and *MSP7* (*PVX\_082665*), *Pv-fam-b* (*PVX\_002525*), *Pv-fam-e*  
125 (*PVX\_089875*), the reticulocyte binding protein gene *RBP2c* (*PVP01\_0534300*), serine-  
126 repeat antigen 3 (*SERA*; *PVX\_003840*), as well as virulent genes (*VIR*) such as *VIR22*  
127 (*PVX\_097530*) and *VIR12* (*PVX\_083590*) [23-29]. Polymorphisms in genes associated  
128 with immune evasion and reticulocyte invasion have important implications for the  
129 invasion efficiency and severity of *P. vivax* infections. Members of the erythrocyte  
130 binding gene family, including reticulocyte binding proteins (*RBPs*), Duffy-binding  
131 proteins (*DBPs*), and merozoite surface proteins (*MSP3* and *MSP7*) have been  
132 previously shown to exhibit high sequence variation in *P. vivax* [20, 30]. The  
133 polymorphisms in *RBP1* and *RBP2* genes may relate to an increased capability of  
134 erythrocyte invasion by *P. vivax* [31-33]. It has been suggested that *PvRBP2b-TfR1*

135 interaction is vital for the initial recognition and invasion of host reticulocytes [34], prior  
136 to the engagement of *PvDBP1* and Duffy antigen chemokine receptor (*DARC*) and  
137 formation of a tight junction between parasite and erythrocyte [35]. Apart from *PvRBP*,  
138 Reticulocyte Binding Surface Antigen (*PvRBSA*) [36], an antigenic adhesin, may also  
139 play a key role in *P. vivax* parasites binding to target cells, possessing the capability of  
140 binding to a population of reticulocytes with a different Duffy phenotype [37, 38].  
141 Another erythrocyte binding protein gene (*PvEBP*), a paralog of *PvDBP1*, which harbors  
142 all the hallmarks of a *Plasmodium* red blood cell invasion protein, including conserved  
143 Duffy-binding like and C-terminal cysteine-rich domains [39], has been recently shown  
144 to be variable in copy number in the Malagasy *P. vivax* [39]. Functional analyses  
145 indicated that region II of this gene bound to both Duffy-positive and Duffy-negative  
146 reticulocytes, although at a lower frequency compared to *PvDBP*, suggestive of its role  
147 in erythrocyte invasion [40]. Both *PvEBP1* and *PvEBP2* genes exhibit high genetic  
148 diversity and are common antibody binding targets associated with clinical protection  
149 [41, 42]. Other proteins such as tryptophan-rich antigen gene (*TRAg*), anchored  
150 micronemal antigen (*GAMA*), and Rhoptry neck protein (*RON*) have also been  
151 suggested to play a role in red cell invasion, especially in low-density infections [43-47].  
152 Information of the polymorphisms in these genes will have important implications on the  
153 dynamics of host-parasite interactions.

154         Compared to Southeast Asia and South America where *P. vivax* is highly  
155 endemic, data on polymorphisms in erythrocyte binding gene candidates of *P. vivax*  
156 from Africa is limited. Filling the gap is critical for identifying functional genes in  
157 erythrocyte invasion, biomarkers for tracking the African *P. vivax* isolates, as well as

158 potential gene targets for vaccine development. It was previously thought that most  
159 African populations were immune to *P. vivax* infections due to the absence of *DARC*  
160 gene expression required for erythrocyte invasion. However, several recent reports  
161 have indicated the emergence and potential spread of *P. vivax* across Africa [32, 48-  
162 50]. The objective of this study was to describe genomic variation of *P. vivax* from  
163 Ethiopia. Specifically, we examined the level of genetic polymorphisms in a panel of 64  
164 potential erythrocyte binding protein genes that have been suggested to play a role in  
165 the parasite-host invasion process. In addition, we inferred transmission patterns of *P.*  
166 *vivax* infections from different study sites based on the genetic variants. A recent study  
167 by Auburn *et al.* [20] has compared the genetic variants of *P. vivax* from Ethiopia with  
168 other geographical isolates. In the present study, we focus on the genomic  
169 characteristics of *P. vivax* among different study sites in Ethiopia with the goals to  
170 establish a baseline for genome comparison with the Duffy-negative *P. vivax* in our  
171 ongoing investigation, as well as to develop a panel of informative Single Nucleotide  
172 Polymorphic (SNP) markers diagnostic at a micro-geographical scale.

173

## 174 **Materials and Methods**

### 175 **Ethics statement**

176 Scientific and ethical clearance was obtained from the Institutional Scientific and Ethical  
177 Review Boards of Jimma and Addis Ababa Universities in Ethiopia, and The University  
178 of North Carolina, Charlotte, USA. Written informed consent/assent for study  
179 participation was obtained from all consenting heads of households, parents/guardians



180 (for minors under age of 18), and each individual who was willing to participate in the  
181 study.

182

### 183 **Study area and sample collection**

184 Genomic DNA was extracted from 22 clinical samples collected in Jimma, southwestern  
185 Ethiopia during peak transmission season (September – November, 2016; Figure 1).

186 Finger-pricked blood samples were collected from malaria symptomatic (who has fever  
187 with axillary body temperature > 37.5°C and with confirmed asexual stages of malaria  
188 parasite based on microscopy) or febrile patients visiting the health centers or hospitals  
189 at each of the study sites. Thick and thin blood smears were prepared for microscopic

190 examination, and 4-6 ml of venous blood were collected from each *P. vivax*-confirmed

191 patient in K2 EDTA blood collection tubes. For the whole blood samples, we used the

192 Lymphoprep/Plasmodpur-based protocol to deplete the white blood cells and enrich the

193 red blood cell pellets [51]. DNA was then extracted from approximately 1 ml of the red

194 blood cell pellets using Zymo Bead Genomic DNA kit (Zymo Research) following the

195 manufacturer's procedures. The extracted DNA were first assessed by nested and

196 quantitative PCR methods to confirm and quantify *P. vivax* of the infected samples [52].

197 From a larger set of samples, we then performed microsatellite analyses using seven

198 different loci [53]. Only monoclonal samples were selected and proceeded for

199 sequencing. Whole genome sequencing was conducted on the Illumina HiSeq 3000

200 Sequencing Platform at the Wellcome Sanger Institute (European Nucleotide Archive

201 [ENA] accession number of each sample in Table 1). The generated sequence reads

202 were mapped individually to the publicly available reference genome PvP01 from Gene

203 DB using Bowtie version 2 [54]. The original 22 samples were processed to remove  
204 reads other than *P. vivax*. The percentage coverage of the *P. vivax* reads in our  
205 samples were high enough to not affect the results. An additional 24 sample sequence  
206 data were obtained as FASTQ files from the ENA. These samples were collected from  
207 Arbaminch, Badowacho, Halaba, and Hawassa in southwestern Ethiopia (Figure 1), the  
208 Duffy status of each of these 24 samples is unknown. They were then aligned to the  
209 PVP01 reference genome using BWA-MEMv.2 with default settings [55, 56]. The overall  
210 quality of each resulting BAM was assessed using FASTQC. Similarly, we concluded  
211 that the percentage of the *P. vivax* reads covered in the additional 24 samples were  
212 high enough to reflect the dominant signal of the variants and negate polyclonal  
213 influences. Two of our samples displayed a significant decline in average quality in read  
214 mapping and were therefore removed from further SNP variant and copy number  
215 variation analyses.

216

### 217 **SNP discovery, annotation, and filtering**

218 Potential SNPs were identified by SAM tools v.1.6 mpileup procedure [57] in conjunction  
219 with BCF tools v.1.6 [57] across all 44 sample BAM files using the PVP01 reference  
220 genome. Compared to the Salvador-I, the PVP01 reference genome consists of 14  
221 major chromosomal sequences, and provides a greater level of gene annotation power  
222 and improved assembly of the subtelomeres [56]. We analyzed only sequence reads  
223 that were mapped to these 14 major chromosomal sequences. The hypervariable and  
224 subtelomeric regions in our samples were retained during the variant calling procedure  
225 and each sample BAM file had duplicates marked using SAMtools 1.6 markdup

226 procedure. For the mpileup procedure, the maximum depth threshold, which determines  
227 the number of maximum reads per file at a position, was set to 3,000 million to ensure  
228 that the maximum amount of reads for each position was not reached. Samples were  
229 pooled together using a multisampling variant calling approach. The SNPs were then  
230 annotated with SnpEff v.4.3T [58] based on the annotated gene information in GeneDB.  
231 Filtering was done using the following standard metrics, including Read Position Bias,  
232 Mapping Quality vs Strand Bias, Raw read depth, Mapping Quality Bias, Base Quality  
233 Bias, and Variant Distant Bias produced by SAM tools and BCF tools during the variant  
234 calling procedure. In Snp Sift, data was filtered by choosing SNPs that had a Phred  
235 Quality score  $\geq 40$ , a raw read depth (DP)  $\geq 30$ , and a base quality bias  $>0.1$  [59]. We  
236 then calculated the allele frequency for each SNP position for all 44 samples using the  
237 frequency procedure in VCF tools v.0.1.15 [60]. The total number of SNPs across all  
238 samples, as well as the number of nonsynonymous and synonymous mutations were  
239 recorded. Mutations were compared among the 14 chromosomes in addition to a panel  
240 of 64 erythrocyte binding genes.

241

## 242 **Copy number variation analyses**

243 Copy number variation of gene regions was assessed with CNVnator [61]. CNVnator  
244 uses mean-shift theory, a partitioning procedure based on an image processing  
245 technique and additional refinements including multiple bandwidth partitioning and GC  
246 correction [61]. We first calculated the read depth for each bin and correct GC-bias. This  
247 was followed by mean-shift based segment partition and signal merging, which  
248 employed an image processing technique. We then performed CNV calling, of which

249 segments with a mean RD signal deviating by at least a quarter from genomic average  
250 read depth signal were selected and regions with a  $P$ -value less than 0.05 were called.  
251 A one-sided test was then performed to call additional copy number variants. SAM tools  
252 v.1.6 was utilized in our data preprocessing step to mark potential duplicates in the BAM  
253 files and followed the CNV detection pipeline [62]. We extracted the read mappings  
254 from each of BAM files for all chromosomes. Once the root file was constructed using  
255 the extracted reads, we generated histograms of the read depths using a bin size of  
256 100. The statistical significance for the windows that showed unusual read depth was  
257 calculated and the chromosomes were partitioned into long regions that have similar  
258 read depth.

259 To validate the results from CNVnator, we used the GATK4 copy number  
260 detection pipeline to further examine gene copy number [63-65]. The read coverage  
261 counts were first obtained from pre-processed genomic intervals of a 1000-bp window  
262 length based on the PvP01 reference genome. The read fragment counts were then  
263 standardized using the Denoise Read Counts that involved two transformations. The  
264 first transformation was based on median counts, including the  $\log_2$  transformation, and  
265 the counts were normalized to center around one. In the second transformation, the tool  
266 denoises was used to standardized copy ratios using principal component analysis.

267

### 268 **Test for positive selection**

269 Regions of positive selection were examined among the 44 Ethiopian *P. vivax* isolates  
270 using the integrated haplotype score approach, specifically the SciKit-Allel for python, a  
271 package used for analysis of large scale genetic variation data [66]. Before the samples

272 were run through Scikit-allel, genotypes for each of the samples were phased using  
273 BEAGLE [67]. Genes that were detected with signals of positive selection by SciKit-  
274 Allel, as well as a panel of 64 potential erythrocyte binding genes were further evaluated  
275 using the PAML package (Phylogenetic Analysis by Maximum Likelihood) [68]. Using  
276 the codeml procedure in PAML, DNA sequences were analyzed with the maximum  
277 likelihood approach in a phylogenetic framework. The synonymous and  
278 nonsynonymous mutation rates between protein-coding DNA sequences were then  
279 estimated in order to identify potential regions of positive selection. We created two  
280 models, the neutral model M1 and the selection model M2. The average  $d_N/d_S$  values  
281 were estimated across all branches in both M1 and M2 models and the average  $d_N/d_S$   
282 values across all sites in the M2 model. The  $d_N/d_S$  values were compared between the  
283 two models using a likelihood ratio test for significant positive selection.

284

### 285 **Comparison of nucleotide diversity among EBP gene regions**

286 Based on the literature [23-33], we identified 64 gene regions that are potentially related  
287 to erythrocyte binding in *P. vivax* (Supplementary Table 1). These included the *DBP*  
288 (duffy binding protein), *EBP* (erythrocyte binding protein), *MSP* (merozoite surface  
289 protein), and *RBP* (reticulocyte binding protein) multigene families, the tryptophan rich  
290 antigen gene family (*TRAg*), GPI-anchored microanemal antigen (*GAMA*), microneme  
291 associated antigen (*MA*), rhoptry associated adhesin (*RA*), high molecular weight  
292 rhoptry protein 3 (*RHOP3*), and rhoptry neck protein (*RON*) genes. Previous study has  
293 shown that the transcriptome profiles of the *TRAg* genes were differentially transcribed  
294 at the erythrocytic stages, indicating that these genes may play specific roles in blood-

295 stage development [43]. The reticulocyte binding protein multigene family encodes  
296 genes that each have a receptor on the surface that is essential for the host-invasion  
297 stage of *P. vivax* [69]. The *MSP* multigene family, currently assumed to be a candidate  
298 for vaccine generation, also plays a role in the invasion stage of *P. vivax* and is also  
299 immunogenic [26]. The nucleotide diversity of 64 potential erythrocyte binding genes  
300 were compared among the 44 *P. vivax* sample consensus sequences using DnaSP  
301 [70]. The Pairwise-Deletion method where gaps were ignored in each pairwise  
302 comparison was used for this calculation.

303

#### 304 **Genetic relatedness and transmission network analyses**

305 Phylogenetic analyses were performed to infer the genetic relatedness among the 44  
306 Ethiopian isolates. Sequence alignment was first conducted using a multiple sequence  
307 alignment program in MAFFT v. 7 [71]. The alignment was then trimmed to remove  
308 gaps using trimal (the *gappyout* option) that trimmed the alignments based on the gap  
309 percentage count over the whole alignment. After sequence editing, we concatenated  
310 all alignment files using FASconCAT-G [72], a perl program that allows for  
311 concatenation and translation (nucleotide to amino acid states) of multiple alignment  
312 files for phylogenetic analysis. We used the maximum likelihood method implemented in  
313 the Randomized Accelerated Maximum Likelihood (RAxML) v8 to construct  
314 phylogenetic trees [73]. The GTRGAMMA model was used for the best-scoring  
315 maximum likelihood tree. The GTR model incorporates the optimization of substitution  
316 rates and the GAMMA model accounts for rate heterogeneity. A total of 100 rapid  
317 bootstrap runs were conducted to evaluate the confidence of genetic relationships. In

318 addition, we performed principal component analyses using the glPCA function in R, a  
319 subset of the adegenet package [74], to determine the genetic relatedness of the  
320 samples among the different study sites in Ethiopia. A transmission network was  
321 created using StrainHub, a tool for generating transmission networks using phylogenetic  
322 information along with isolate metadata [75]. The transmission network was generated  
323 using the locations of the samples as the nodes and calculating the source hub ratio  
324 between each location. The source hub ratio was calculated by the number of  
325 transitions originating from a node over the total number of transitions related to that  
326 node. A node with a ratio close to 1 indicates a source, a ratio close to 0.5 indicates a  
327 hub, and a ratio close to 0 indicates a sink for the *P. vivax* infections.

328

## 329 **Results**

### 330 **Distribution of SNPs among the chromosomes and EBP genes**

331 A total of 252,973 SNPs were detected among the 44 Ethiopian *P. vivax* samples  
332 (Figure 2), with 21.5% (54,336 out of 252,973) nonsynonymous and 78.5% (198,637 out  
333 of 252,973) synonymous mutations (Figure 3A). The highest number of SNPs were  
334 observed on chromosomes 7 (28,856 SNPs; 11.4%), 9 (28,308 SNPs; 11.2%), and 12  
335 (28,190 SNPs; 11.1%); whereas the lowest number of SNPs were observed on  
336 chromosomes 3 (6,803 SNPs; 2.7%), 6 (5,044 SNPs; ~2%), and 13 (8,809 SNPs; 3.5%;  
337 Figure 3A; Supplementary Table 2).

338

339 The 64 erythrocyte binding genes accounted for 3,607 of the total SNPs, with 1685  
340 (46.7%) identified as nonsynonymous and 1922 (53.3%) as synonymous mutations

341 (Figure 3B). Among these genes, the highest number of SNPs were observed in  
342 reticulocyte binding protein gene (*RBP2c*) on chromosome 5, followed by the *MSP3*  
343 multigene family (*MSP3.5*, *MSP3.9* and *MSP3.8*) on chromosome 10. Nucleotide  
344 diversity also showed to be highest in the *RBP* and *MSP3* multigene families, with an  
345 average nucleotide diversity of 1.3% and 2.8%, respectively, among our samples  
346 (Figure 3B). By contrast, the lowest number of SNPs were observed in the Duffy  
347 binding protein gene (*DBP1*) on chromosome 6 with a total of 13 SNPs, of which 12  
348 were identified as nonsynonymous and one as synonymous mutations (Figure 3B).  
349 Likewise, another erythrocyte binding protein (*EBP2*), located also on chromosome 6,  
350 was one of the least variable genes with only one nonsynonymous mutation. The *TRAg*  
351 gene family also showed a low level of nucleotide diversity when compared to the other  
352 *EBP* gene families with an average nucleotide diversity of 0.2% (Figure 3B).

353

#### 354 **Gene regions under positive selection**

355 Based on the integrated haplotype scores, positive selection was detected in 13 gene  
356 regions (Figure 4). These included the sub-telomeric protein 1 (*STP1*) on chromosome  
357 5, the membrane associated erythrocyte binding-like protein (*MAEBL*) on chromosome  
358 9, *MSP3.8* on chromosome 10, as well as various plasmodium interspersed repeats  
359 (*PIR*) protein genes on chromosomes 3, 5, 7, 10, 11, and 12 (Figure 4). Based on  
360 PAML, 25 out of the 64 erythrocyte binding genes showed evidence of positive selection  
361 (Table 2; Supplementary Table 3). The majority of these genes belong to the *TRAg*  
362 multigene family. The *TRAg* genes had an average  $d_N/d_S$  ratio of 2.75 across all  
363 branches and an average of 5.75 across all sites for the M2 model tested for selection



364 (Table 2). Compared to the other *TRAg* genes, *TRAg15* had more sites detected under  
365 positive selection, with 50 of the sites showing a posterior probability greater than 50%  
366 and 43 showing a posterior probability greater than 95% (Table 2). While the *TRAg4*  
367 gene had the highest  $d_N/d_S$  ratio across all sites among other *TRAg* genes, only six sites  
368 were shown under positive selection with a posterior probability greater than 50% and  
369 one with a posterior probability greater than 95%.

370 All *RBP* genes, except for *RBP2c*, showed regions with significant signals of  
371 positive selection (average  $d_N/d_S$  ratio across all sites: 5.11; Table 2). Among them,  
372 *RBP2p1* had the largest number of sites with posterior probabilities greater than 95%  
373 (Table 2). Among all the *MSP* genes, only *MSP5*, *MSP9*, and *MSP10* indicated regions  
374 under positive selection. The *MSP5* and *MSP9* genes had an average  $d_N/d_S$  ratio of  
375 3.85 across all sites and 1.11 across branches (Table 2). While *MSP10* had an average  
376  $d_N/d_S$  ratio of 1.16 across all branches and less than 1 across all sites, only seven sites  
377 were indicated with posterior probabilities greater than 50% and 95% (Table 2).

378 Although *MSP3.8* showed potential positive selection based on the integrated haplotype  
379 scores (Figure 4), PAML did not show significant evidence of positive selection. For the  
380 *DBP* gene family, *DBP9* showed the highest  $d_N/d_S$  ratio across all sites and branches  
381 (10.39 and 3.88, respectively; Table 2).

382

### 383 **Copy number variation and evolution of high-order copy variants**

384 According to CNVnator, 19 gene regions showed copy number variation among our  
385 samples (Figure 5; Supplementary Table 4). Among them, 11 gene regions were  
386 detected with up to 2-3 copies and 8 gene regions with 4 copies or higher. We observed

387 copy number variation in several *PIR* genes distributed across chromosomes 1, 2, 4, 5,  
388 7, 10 and 12 (Figure 5; Supplementary Table 4). Specifically, for the *PIR* genes located  
389 on chromosome 2 (including PVP01\_0220700, PVP01\_0200200, PVP01\_0200300, and  
390 PVP01\_0200100; Figure 5), more than 20% of the samples had 2-3 copies and  
391 approximately 2-4% of the samples had 4 copies or higher. Among the 64 erythrocyte  
392 binding genes, duplications were observed in *DBP1* on chromosome 6 and *MSP3* on  
393 chromosome 10. *DBP1* ranged from one to as high as five copies, and *MSP3* ranged  
394 from one to as high as three copies among our samples (Figure 5), consistent with  
395 previous findings [19, 20, 76]. The remaining erythrocyte binding genes were detected  
396 with a single copy across our samples.

397 A maximum likelihood tree constructed based on the whole genome sequences  
398 showed an admixture of *P. vivax* isolates with single and multiple *PvDBP* copy number  
399 (Figure 6A). The Ethiopian *P. vivax* isolates were divided into six subclades. Subclade I  
400 contained *P. vivax* samples mostly from Arbaminch and Badowacho with both one and  
401 two *PvDBP* copies. Subclade II contained samples from Jimma and Hawassa with two  
402 *PvDBP* copies. Subclade III contained a mixture of *P. vivax* samples from Arbaminch,  
403 Halaba, Hawassa, and Jimma with single and high-order *PvDBP* copies. This clade was  
404 sister to subclade IV that contained *P. vivax* samples mostly from Jimma (Figure 6A). In  
405 subclade IV, no distinct clusters were detected between isolates with single and multiple  
406 *PvDBP*. Subclade V contained samples from Jimma and subclade VI contained  
407 samples from Arbaminch, Badowacho, Hawassa, and Halaba. Each of the subclades  
408 had samples with both one and two *PvDBP* copies. Similar patterns were observed in  
409 the *MSP3* and *PIR* genes where *P. vivax* isolates with single and multiple copies were

410 clustered together in separate subclades (Figures 6B-D), suggesting that these gene  
411 regions could have expanded multiply among samples at different locations.

412

### 413 **Gene flow and transmission network of the Ethiopian *P. vivax***

414 The principal component analysis based on the SNP variants showed samples from  
415 Arbaminch, Badowacho, Hawassa, and Halaba were genetically closely related but  
416 differentiated from Jimma (Figure 7A). The transmission network indicated that  
417 Arbaminch was the major source or hub of infections where the infections in Jimma,  
418 Hawassa, Badowacho, and Halaba were originated from (Table 3; Figure 7B). On the  
419 other hand, no transmission was originated from Halaba, making this location the  
420 largest sink of transmissions. The greatest extent of gene flow was observed between  
421 Arbaminch and Badowacho (Figure 7B). Hawassa and Jimma showed a source hub  
422 ratio of 0.5, indicating that there are equally as many egress transmissions as ingress  
423 transmissions (Table 3). Although Jimma and Badowacho/Halaba are in close  
424 geographical proximity, no apparent gene flow was observed between these sites.

425

### 426 **Discussion**

427 Across the genome, the total number of SNPs observed among 44 *P. vivax* isolates in  
428 Ethiopia were comparable to those previously reported in South American [77] and  
429 Southeast Asian countries [19]. For instance, 303,616 high-quality SNPs were detected  
430 in 228 *P. vivax* isolates from Southeast Asia and Oceania in a previous study, of which  
431 Sal-I was used as the reference sequence and subtelomeric regions were discarded  
432 [19]. Auburn *et al.* [20] found that the average nucleotide diversity in Ethiopia was lower

433 than in Thailand and Indonesia, but higher than in Malaysia. Chromosomes 3, 4, and 5  
434 have been previously shown to contain the lowest proportion of synonymous SNPs than  
435 the other parts of the genome [12]. In the present study, chromosomes 3 and 6 were  
436 found to have the lowest number of both synonymous and nonsynonymous SNPs. This  
437 follows observations made in other studies done with nucleotide diversity ranging from  
438 0.8 SNPs per kb in North Korea to 0.59 SNPs per kb in Peru [78]. Among the 64  
439 erythrocyte binding gene candidates, the MSP and RBP multigene families showed the  
440 highest level of genetic variation. This agrees with previous studies that reported a  
441 remarkably high diversity in *RBP2* than in *RBP1* and its homolog group in *P. falciparum*  
442 [31]. In the Greater Mekong Subregion, the *MSP3* and *PIR* gene families also indicated  
443 high levels of genetic diversity with 1.96% and 1.92% SNPs per base respectively,  
444 confirming that members of multigene families are highly variable genetically [30, 79].  
445 Such diversity suggested that the binding domains of these genes could be under  
446 differential selection pressure. This pattern has been observed in previous studies and  
447 is likely due to their critical role in reticulocyte invasion, immunogenic properties, and  
448 human migration [26, 80-82].

449 Both CNVnator and GATK4 showed high order copies in several *PIR* gene  
450 regions. In addition, the *PIR* and *STP1* genes were also indicated with significant  
451 selection based on the iHS calculations. The *PIR* gene family, which includes *STP1*, are  
452 located on the subtelomere regions and is a highly variable multigene family ranging  
453 from 1,200 genes in the reference strain PvP01 to 346 genes in monkey-adapted strain  
454 Salvador-I [56, 83]. Our analyses included only SNP variants that had a quality score of  
455 40 or higher. Also, we used the PVP01 reference genome to map and annotate the

456 subtelomeric regions, with the goal to reflect variability and features across the entire  
457 chromosome; whereas previous studies used the Sal-I reference genome with  
458 hypervariable and subtelomeric regions removed to minimize mapping errors [19, 84].  
459 A recent study in *P. chabaudi* suggested that polymorphisms in *PIR* genes could affect  
460 the virulence of the parasites following passage from the mosquitoes [85]. Such a  
461 variation in copy number of the *PIR* gene family has also been reported in *P. cynomolgi*  
462 and *P. vivax* [86], suggesting that gene duplication could have been occurred  
463 repeatedly in the ancestral lineages [86]. The *PIR* multigene family is one of the largest  
464 gene families identified so far in *P. vivax* with several different potential functions.  
465 Some *PIR* genes encode proteins on the surface of infected red blood cells, which could  
466 confer to immune evasion; others encode proteins involved in signaling, trafficking and  
467 adhesion functions [83]. Positive selection detected in the *PIR* genes among the  
468 Ethiopian *P. vivax* isolates may have important implications on the susceptibility of the  
469 mosquito hosts [87].

470 For the *P. vivax* isolates in Southeast Asia, copy number variation was observed  
471 in nine gene regions including *DBP1*, *MDR1*, and *PVX\_101445* (on chromosome 14)  
472 with copy number ranging from 3 to 4 [19]. *DBP1* and *MSP3* showed higher order  
473 copies when compared to other genomic regions. In this study, the highest and most  
474 variable copy number variations were detected in the *DBP1*, with copy numbers ranging  
475 from one to as high as five. Likewise, for the *MSP3*, copy numbers ranging from one to  
476 as high as four. Based on the phylogeny, *DBP1* and *MSP3* expansion had occurred  
477 multiple times as tandem copies. These findings were consistent with earlier studies  
478 [19, 76] and suggested that gene expansion may play a key role in host cell invasion

479 [88]. For all other putative erythrocyte binding genes, only a single copy was detected  
480 among all samples. A larger sample in future investigations would verify this  
481 observation.

482 In the present study, we identified a panel of 64 putative erythrocyte binding gene  
483 candidates based on the information from the literature and analyzed their  
484 polymorphisms. However, we did validate the function for each of these genes. Among  
485 these 64 putative erythrocyte binding gene candidates, *MAEBL* was shown to be highly  
486 conserved in *Plasmodium* [89], had the highest signal for positive selection among the  
487 *P. vivax* samples in Ethiopia. In *P. berghei*, *MAEBL* is a sporozoite attachment protein  
488 that plays a role in binding and infecting the mosquito salivary gland [89]. In *P.*  
489 *falciparum*, *MAEBL* is located in the rhoptries and on the surface of mature merozoites,  
490 and expresses at the beginning of schizogony [89]. In *P. vivax*, *MAEBL* is a conserved  
491 antigen expressed in blood stages, as well as in the mosquito midgut and salivary gland  
492 sporozoites [89, 90]. The *MAEBL* antigen contains at least 25 predicted B-cell epitopes  
493 that are likely to elicit antibody-dependent immune responses [91]. Positive selection  
494 observed in this gene region among the Ethiopian *P. vivax* isolates could be associated  
495 with the immunity-mediated selection pressure against blood-stage antigens. Though  
496 *DBP1* had the highest and most diverse copy number variation, no significant signal of  
497 positive selection was detected.

498 It is noteworthy that the calculation of integrated haplotype scores and the  
499 accuracy of phasing genotypes using BEAGLE were dependent on the levels of linkage  
500 disequilibrium of the whole genomes. The higher the levels of linkage disequilibrium, the  
501 more accurate are the phased genotypes and thus the iHS score. Pearson *et al.* [19]

502 found that *P. vivax* experienced drops in linkage disequilibrium after correcting for  
503 population structure and other confounders. Linkage disequilibrium of *P. vivax*  
504 genomes has been previously shown to be associated with the rate of genetic  
505 recombination and transmission intensity [92-94]. In high transmission sites of Papua  
506 New Guinea and the Solomon Islands, no identical haplotypes and no significant  
507 multilocus LD were observed, indicating limited inbreeding and random associations  
508 between alleles in the parasite populations [95, 96]. However, when transmission  
509 intensity declined, similar haplotypes and significant LD were observed possibly due to  
510 self-fertilization, inbreeding and/or recombination of similar parasite strains  
511 [92]. Multilocus LD is significantly associated with the genetic relatedness of the  
512 parasite strains [97], but inversely associated with the proportion of polyclonal infections  
513 [98]. In Southwestern Ethiopia, malaria transmission ranged from low to moderate, and  
514 LD levels varied markedly among the study sites [53, 99]. To address this limitation in  
515 BEAGLE, all genes that were detected with positive selection in BEAGLE were further  
516 analyzed with PAML for verification. Future study should include broad samples to  
517 thoroughly investigate selection pressure at the population level and the function  
518 significance of polymorphisms in the *MAEBL* and *PIR* genes.

519 Previous studies have shown high levels of genetic diversity among *P. vivax*  
520 isolates in endemic countries [16, 100, 101]. Such a diversity was directly related to high  
521 transmission intensity and/or frequent gene exchange between parasite populations via  
522 human movement [4, 12, 13, 53]. For example, previous studies using microsatellites  
523 have demonstrated a consistently high level of intra-population diversity ( $H_E = 0.83$ ) but  
524 low between-population differentiation ( $F_{ST}$  ranged from 0.001-0.1] in broader regions of

525 Ethiopia [53, 99]. High heterozygosity was also observed in *P. vivax* populations from  
526 Qatar, India, and Sudan (average  $H_E = 0.78$ ; 62), with only slight differentiation from *P.*  
527 *vivax* in Ethiopia ( $F_{ST} = 0.19$ ) [102]. Frequent inbreeding among dominant clones [92,  
528 95] and strong selective pressures especially in relapse infections [19, 20, 102, 103]  
529 may also contribute to close genetic relatedness between and within populations. Thus,  
530 in this study, it is not surprising to detect a high level of parasite gene flow among the  
531 study sites at a small geographical scale, despite the limited number of samples. In the  
532 present study, we successfully employed a transmission network model to identify  
533 transmission paths, as well as the source and sink of infections in the region, beyond  
534 simply indicating genetic relationships.

535 To conclude, this study elaborated on the genomic features of *P. vivax* in  
536 Ethiopia, particularly focusing polymorphisms in erythrocyte binding genes that  
537 potentially play a key role in local parasite invasion, a critical question given the mixed  
538 Duffy positive and negative populations of Ethiopia. The findings provided baseline  
539 information on the genomic variability of *P. vivax* infections in Ethiopia and allowed us to  
540 compare the genomic variants of *P. vivax* between Duffy-positive and Duffy-negative  
541 individuals as the next step of our ongoing investigation. Further, we are in progress of  
542 developing a panel of informative SNP markers to track transmission at a micro-  
543 geographical scale.

544

## 545 **Data Availability**

546 Additional information is provided as supplementary data accompanies this paper.

547 Sequence data of this study are deposited in the European Nucleotide Archive (ENA)



548 and the accession number of each sample is listed in Table 1.

549

## 550 **Acknowledgements**

551 We are greatly indebted to the staffs and technicians from Jimma University for field  
552 sample collection, the communities and hospitals for their support and willingness to  
553 participate in this research.

554

## 555 **Funding**

556 This research was funded by National Institutes of Health (NIH R15 AI138002 to EL;  
557 NIH U19 AI129326 to GY; NIH R01 AI050243 to GY; D43 TW001505 to GY) and The  
558 Wellcome Trust 206194/Z/17/Z to JR. The funders had no role in study design, data  
559 collection and analysis, decision to publish, or preparation of the manuscript.

560

## 561 **Competing interests**

562 The authors have declared that no competing interests exist.

563

## 564 **References**

- 565 1. World Health Organization. World Malaria Report 2018. WHO, Geneva.
- 566 2. White MT, Shirreff G, Karl S, Ghani AC, Mueller I. Variation in relapse frequency and  
567 the transmission potential of *Plasmodium vivax* malaria. Proc Biol Sci. 2016;283:  
568 20160048.
- 569 3. Hemingway J, Shretta R, Wells TNC, Bell D, Djimdé AA, Achee N, et al. Tools and  
570 strategies for malaria control and elimination: what do we need to achieve a grand  
571 convergence in malaria? PLOS Biol. 2016;14: e1002380.

- 572 4. Hupalo DN, Luo Z, Melnikov A, Sutton PL, Rogov P, Escalante A, et al. Population  
573 genomics studies identify signatures of global dispersal and drug resistance in  
574 *Plasmodium vivax*. Nat Genet. 2016;48: 953–8.
- 575 5. Vallejo AF, Martinez NL, Tobon A, Alger J, Lacerda MV, Kajava AV, et al. Global  
576 genetic diversity of the *Plasmodium vivax* transmission-blocking vaccine candidate  
577 Pvs48/45. Malar J. 2016;15: 202.
- 578 6. Tham WH, Beeson JG, Rayer JC. *Plasmodium vivax* vaccine research - we've only  
579 just begun. Int J Parasitol. 2017;47: 111-118.
- 580 7. Kale S, Yadav CP, Rao PN, Shalini S, Eapen A, Srivasatava HC, Sharma SK, Pande  
581 V, Carlton JM, Singh OP, Mallick PK. Antibody responses within two leading  
582 *Plasmodium vivax* vaccine candidate antigens in three geographically diverse  
583 malaria-endemic regions of India. Malar J. 2019;18: 425.
- 584 8. Baniecki ML, Faust AL, Schaffner SF, Park DJ, Galinsky K, Daniels RF, et al.  
585 Development of a single nucleotide polymorphism barcode to genotype *Plasmodium*  
586 *vivax* infections. PLoS Negl Trop Dis. 2015;9: e0003539.
- 587 9. Diez Benavente E, Campos M, Phelan J, Nolder D, Dombrowski JG, Marinho CRF, et  
588 al. A molecular barcode to inform the geographical origin and transmission dynamics  
589 of *Plasmodium vivax* malaria. PLoS Genet. 2020;16: e1008576.
- 590 10. Parobek CM, Lin JT, Saunders DL, Barnett EJ, Lon C, Lanteri CA, et al. Selective  
591 sweep suggests transcriptional regulation may underlie *Plasmodium vivax* resilience  
592 to malaria control measures in Cambodia. Proc. Natl. Acad. Sci. U.S.A. 2016;113: 50.
- 593 11. Auburn S, Benavente ED, Miotto O, Pearson RD, Amato R, Grigg MJ, et al.  
594 Genomic analysis of a pre-elimination Malaysian *Plasmodium vivax* population  
595 reveals selective pressures and changing transmission dynamics. Nat Commun.  
596 2018;9: 2585.
- 597 12. Benavente ED, Ward Z, Chan W, Mohareb FR, Sutherland CJ, Roper C, et al.  
598 Genomic variation in *Plasmodium vivax* malaria reveals regions under selective  
599 pressure. PLoS One. 2017;12: 5.
- 600 13. Lima-Junior JDC, Pratt-Riccio LR. Major histocompatibility complex and malaria:  
601 focus on *Plasmodium vivax* Infection. Front. Immunol. 2016;7: 13.

- 602 14. Kano FS, Souza AMD, Torres LDM, Costa MA, Souza-Silva FA, Sanchez BAM, et  
603 al. Susceptibility to *Plasmodium vivax* malaria associated with DARC (Duffy antigen)  
604 polymorphisms is influenced by the time of exposure to malaria. *Sci. Rep.* 2018;8:  
605 13851.
- 606 15. Ventocilla JA, Nuñez J, Tapia LL, Lucas CM, Manock SR, Lescano AG, et al.  
607 Genetic variability of *Plasmodium vivax* in the north coast of Peru and the Ecuadorian  
608 amazon basin. *Am. J. Trop. Med. Hyg.* 2018;99: 27–32.
- 609 16. Fola AA, Harrison GLA, Hazairin MH, Barnadas C, Hetzel MW, Iga J, et al. Higher  
610 complexity of infection and genetic diversity of *Plasmodium vivax* than *Plasmodium*  
611 *falciparum* across all malaria transmission zones of Papua New Guinea. *Am. J. Trop.*  
612 *Med. Hyg.* 2017;16–0716.
- 613 17. Barry AE, Waltmann A, Koepfli C, Barnadas C, Mueller I. Uncovering the  
614 transmission dynamics of *Plasmodium vivax* using population genetics. *Pathog. Glob.*  
615 *Health.* 2015;109: 142–52.
- 616 18. Koepfli C, Rodrigues PT, Antao T, Orjuela-Sánchez P, Eede PVD, Gamboa D, et al.  
617 *Plasmodium vivax* diversity and population structure across four continents. *PLoS*  
618 *Negl. Trop. Dis.* 2015;9: e0003872.
- 619 19. Pearson RD, Amato R, Auburn S, Miotto O, Almagro-Garcia J, Amaratunga C, et al.  
620 Genomic analysis of local variation and recent evolution in *Plasmodium vivax*. *Nat*  
621 *Genet.* 2016;48: 959–64.
- 622 20. Auburn S, Getachew S, Pearson RD, Amato R, Miotto O, Trimarsanto H, et al.  
623 Genomic analysis of *Plasmodium vivax* in southern Ethiopia reveals selective  
624 pressures in multiple parasite mechanisms. *J. Infect. Dis.* 2019;220: 1738–49.
- 625 21. Costa GL, Amaral LC, Fontes CJF, Carvalho LH, Brito CFAD, Sousa TND.  
626 Assessment of copy number variation in genes related to drug resistance in  
627 *Plasmodium vivax* and *Plasmodium falciparum* isolates from the Brazilian Amazon  
628 and a systematic review of the literature. *Malar. J.* 2017;16: 152.
- 629 22. Lin JT, Muth S, Rogers WO, Ubalee R, Kharabora O, Juliano JJ, et al. *Plasmodium*  
630 *vivax* isolates from Cambodia and Thailand show high genetic complexity and distinct  
631 patterns of *P. vivax* multidrug resistance gene 1 (pvmdr1) polymorphisms. *Am. J.*  
632 *Trop. Med. Hyg.* 2013;88: 1116–23.

- 633 23. Cornejo OE, Fisher D, Escalante AA. Genome-wide patterns of genetic  
634 polymorphism and signatures of selection in *Plasmodium vivax*. *Genome Biol. Evol.*  
635 2014;7: 106–19.
- 636 24. Chen E, Salinas ND, Huang Y, Ntumngia F, Plasencia MD, Gross ML, et al. Broadly  
637 neutralizing epitopes in the *Plasmodium vivax* vaccine candidate duffy binding  
638 protein. *Proc. Natl. Acad. Sci. U.S.A.* 2016;113: 6277–82.
- 639 25. Singh V, Gupta P, Pande V. Revisiting the multigene families: *Plasmodium* var and  
640 vir genes. *J Vector Borne Dis.* 2014;51: 75–81.
- 641 26. Rice BL, Acosta MM, Pacheco MA, Carlton JM, Barnwell JW, Escalante AA. The  
642 origin and diversification of the merozoite surface protein 3 (msp3) multi-gene family  
643 in *Plasmodium vivax* and related parasites. *Mol. Phylogenetics Evol.* 2014;78: 172–  
644 84.
- 645 27. Lu F, Li J, Wang B, Cheng Y, Kong D-H, Cui L, et al. Profiling the humoral immune  
646 responses to *Plasmodium vivax* infection and identification of candidate immunogenic  
647 rhoptry-associated membrane antigen (RAMA). *J. Proteom.* 2014;102: 66–82.
- 648 28. Rahul C, Krishna KS, Pawar AP, Bai M, Kumar V, Phadke S, et al. Genetic and  
649 structural characterization of PvSERA4: potential implication as therapeutic target for  
650 *Plasmodium vivax* malaria. *J. Biomol. Struct. Dyn.* 2013;32: 580–90.
- 651 29. Rahul C, Krishna KS, Meera M, Phadke S, Rajesh V. *Plasmodium vivax*: N-terminal  
652 diversity in the blood stage SERA genes from Indian isolates. *Blood Cells Mol. Dis.*  
653 2015;55: 30–5.
- 654 30. Chen S-B, Wang Y, Kassegne K, Xu B, Shen H-M, Chen J-H. Whole-genome  
655 sequencing of a *Plasmodium vivax* clinical isolate exhibits geographical  
656 characteristics and high genetic variation in China-Myanmar border area. *BMC*  
657 *Genom.* 2017;18: 131.
- 658 31. Rayner JC, Corredor V, Tran TM, Barnwell JW, Huber CS, Galinski MR. Dramatic  
659 difference in diversity between *Plasmodium falciparum* and *Plasmodium Vivax*  
660 reticulocyte binding-like genes. *Am. J. Trop. Med. Hyg.* 2005;72: 666–74.
- 661 32. Gunalan K, Niangaly A, Thera MA, Doumbo OK, Miller LH. *Plasmodium vivax*  
662 infections of duffy-negative erythrocytes: historically undetected or a recent  
663 adaptation? *Trends Parasitol.* 2018;34: 420–9.

- 664 33. Luo Z, Sullivan SA, Carlton JM. The biology of *Plasmodium vivax* explored through  
665 genomics. *Ann. N. Y. Acad. Sci.* 2015;1342: 53–61.
- 666 34. Gruszczyk J, Huang RK, Chan L-J, Menant S, Hong C, Murphy JM, et al. Cryo-EM  
667 structure of an essential *Plasmodium vivax* invasion complex. *Nature.* 2018;559:  
668 135–9.
- 669 35. Chan LJ, Dietrich MH, Nguitragool W, Tham WH. *Plasmodium vivax* reticulocyte  
670 binding proteins for invasion into reticulocytes. *Cell. Microbiol.* 2019; e13110.
- 671 36. Moreno-Pérez DA, Baquero LA, Chitiva-Ardila DM, Patarroyo MA. Characterising  
672 PvRBSA: an exclusive protein from *Plasmodium* species infecting reticulocytes.  
673 *Parasites Vectors.* 2017;10: 243.
- 674 37. Camargo-Ayala PA, Garzón-Ospina D, Moreno-Pérez DA, Ricaurte-Contreras LA,  
675 Noya O, Patarroyo MA. On the evolution and function of *Plasmodium vivax*  
676 reticulocyte binding surface antigen (pvrbsa). *Front. Genet.* 2018;9: 372.
- 677 38. Roesch C, Popovici J, Bin S, Run V, Kim S, Ramboarina S, et al. Genetic diversity  
678 in two *Plasmodium vivax* protein ligands for reticulocyte invasion. *PLOS Negl. Trop.*  
679 *Dis.* 2018;12: e0006555.
- 680 39. Hester J, Chan ER, Menard D, Mercereau-Puijalon O, Barnwell J, Zimmerman PA,  
681 et al. *De-novo* assembly of a field isolate genome reveals novel *Plasmodium vivax*  
682 erythrocyte invasion genes. *PLOS Negl. Trop. Dis.* 2013;7: e2569.
- 683 40. Ntumngia FB, Thomson-Luque R, Torres LDM, Gunalan K, Carvalho LH, Adams  
684 JH. A novel erythrocyte binding protein of *Plasmodium vivax* suggests an alternate  
685 invasion pathway into duffy-positive reticulocytes. *mBio.* 2016;7: e01261-16.
- 686 41. Carias LL, Dechavanne S, Nicolete VC, Sreng S, Suon S, Amaratunga C, et al.  
687 Identification and characterization of functional human monoclonal antibodies to  
688 *Plasmodium vivax* duffy-binding protein. *J. Immunol.* 2019;202: 2648–60.
- 689 42. He WQ, Shakri AR, Bhardwaj R, Franca CT, Stanisic DI, Healer J, et al. Antibody  
690 responses to *Plasmodium vivax* duffy binding and erythrocyte binding proteins predict  
691 risk of infection and are associated with protection from clinical Malaria. *PLOS Negl.*  
692 *Trop. Dis.* 2019;13: e0006987.

- 693 43. Wang B, Lu F, Cheng Y, Chen J-H, Jeon H-Y, Ha K-S, et al. Immunoprofiling of the  
694 tryptophan-rich antigen family in *Plasmodium vivax*. *Infect. Immun.* 2015;83: 3083–  
695 95.
- 696 44. Baquero LA, Moreno-Pérez DA, Garzón-Ospina D, Forero-Rodríguez J, Ortiz-  
697 Suárez HD, Patarroyo MA. PvGAMA reticulocyte binding activity: predicting  
698 conserved functional regions by natural selection analysis. *Parasites Vectors.*  
699 2017;10: 251.
- 700 45. Arévalo-Pinzón G, Bermúdez M, Curtidor H, Patarroyo MA. The *Plasmodium vivax*  
701 rhoptry neck protein 5 is expressed in the apical pole of *Plasmodium vivax* VCG-1  
702 strain schizonts and binds to human reticulocytes. *Malar. J.* 2015;14: 106.
- 703 46. Tyagi K, Hossain ME, Thakur V, Aggarwal P, Malhotra P, Mohammed A, et al.  
704 *Plasmodium vivax* tryptophan rich antigen PvTRAg36.6 interacts with PvETRAMP  
705 and PvTRAg56.6 interacts with PvMSP7 during erythrocytic stages of the parasite.  
706 *Plos One.* 2016;11: e0151065.
- 707 47. Gunalan K, Sá JM, Barros RRM, Anzick SL, Caleon RL, Mershon JP, et al.  
708 Transcriptome profiling of *Plasmodium vivax* in Samira monkeys identifies potential  
709 ligands for invasion. *Proc. Natl. Acad. Sci. U.S.A.* 2019;116: 7053–61.
- 710 48. Zimmerman PA. *Plasmodium vivax* infection in duffy-negative people in Africa. *Am.*  
711 *J. Trop. Med. Hyg.* 2017;97: 636–8.
- 712 49. Battle KE, Lucas TCD, Nguyen M, Howes RE, Nandi AK, Twohig KA, et al. Mapping  
713 the global endemicity and clinical burden of *Plasmodium vivax*, 2000–17: a spatial  
714 and temporal modelling study. *Lancet.* 2019;394: 332–43.
- 715 50. Twohig KA, Pfeffer DA, Baird JK, Price RN, Zimmerman PA, Hay SI, et al. Growing  
716 evidence of *Plasmodium vivax* across malaria-endemic Africa. *PLOS Negl. Trop. Dis.*  
717 2019;13: e0007140.
- 718 51. Auburn S, Campino S, Clark TG, Djimde AA, Zongo I, Pinches R, et al. An Effective  
719 Method to Purify *Plasmodium falciparum* DNA Directly from Clinical Blood Samples  
720 for Whole Genome High-Throughput Sequencing. *Plos One.* 2011;6: e22213.
- 721 52. Lo E, Yewhalaw D, Zhong D, Zemene E, Degefa T, Tushune K, et al. Molecular  
722 epidemiology of *Plasmodium vivax* and *Plasmodium falciparum* malaria among duffy-  
723 positive and duffy-negative populations in Ethiopia. *Malar. J.* 2015;14: 84.

- 724 53. Lo E, Hemming-Schroeder E, Yewhalaw D, Nguyen J, Kebede E, Zemene E, et al.  
725 Transmission dynamics of co-endemic *Plasmodium vivax* and *P. falciparum* in  
726 Ethiopia and prevalence of antimalarial resistant genotypes. PLOS Negl. Trop. Dis.  
727 2017;11: e0005806.
- 728 54. Langmead B, Salzberg SL. Fast gapped-read alignment with bowtie 2. Nat.  
729 Methods. 2012;9: 357–9.
- 730 55. Li H, Durbin R. Fast and accurate short read alignment with Burrows-Wheeler  
731 transform. Bioinformatics. 2009;25:1754–60.
- 732 56. Auburn S, Böhme U, Steinbiss S, Trimarsanto H, Hostetler J, Sanders M, et al. A  
733 new *Plasmodium vivax* reference sequence with improved assembly of the  
734 subtelomeres reveals an abundance of pir genes. Wellcome Open Res. 2016;1: 4.
- 735 57. Li H. A statistical framework for SNP calling, mutation discovery, association  
736 mapping and population genetical parameter estimation from sequencing data.  
737 Bioinformatics. 2011;27: 2987–93.
- 738 58. Cingolani P, Platts A, Wang LL, Coon M, Nguyen T, Wang L, et al. A program for  
739 annotating and predicting the effects of single nucleotide polymorphisms, SnpEff. Fly.  
740 2012;6: 80–92.
- 741 59. Cingolani P, Patel VM, Coon M, Nguyen T, Land SJ, Ruden DM, et al. Using  
742 *Drosophila melanogaster* as a model for genotoxic chemical mutational studies with a  
743 new program, SnpSift. Front. Genet. 2012;3: 35.
- 744 60. Danecek P, Auton A, Abecasis G, Albers CA, Banks E, Depristo MA, et al. The  
745 variant call format and VCFtools. Bioinformatics. 2011;27: 2156–8.
- 746 61. Abyzov A, Urban AE, Snyder M, Gerstein M. CNVnator: An approach to discover,  
747 genotype, and characterize typical and atypical CNVs from family and population  
748 genome sequencing. Genome Res. 2011;21: 974–84.
- 749 62. Li H, Handsaker B, Wysoker A, Fennell T, Ruan J, Homer N, Marth G, Abecasis G,  
750 Durbin R, 1000 Genome Project Data Processing Subgroup. The sequence  
751 alignment/map format and SAMtools. Bioinformatics. 2009;25: 2078–2079.
- 752 63. Mckenna A, Hanna M, Banks E, Sivachenko A, Cibulskis K, Kernytzsky A, et al. The  
753 genome analysis toolkit: a mapreduce framework for analyzing next-generation DNA  
754 sequencing data. Genome Res. 2010;20: 1297–303.

- 755 64. Depristo MA, Banks E, Poplin R, Garimella KV, Maguire JR, Hartl C, et al. A  
756 framework for variation discovery and genotyping using next-generation DNA  
757 sequencing data. *Nat Genet.* 2011;43: 491–8.
- 758 65. Auwera GAVD, Carneiro MO, Hartl C, Poplin R, Angel GD, Levy-Moonshine A, et al.  
759 From fastQ data to high-confidence variant calls: the genome analysis toolkit best  
760 practices pipeline. *Curr Protoc Bioinformatics.* 2013;43: 1-11.
- 761 66. Miles A, Harding N. cggh/scikit-allele: v1.1.8 [Internet]. Zenodo. 2017. Available from:  
762 <https://zenodo.org/record/822784#.XKle6yhKiUk>
- 763 67. Browning SR, Browning BL. Rapid and accurate haplotype phasing and missing  
764 data inference for whole genome association studies by use of localized haplotype  
765 clustering. *Am J Hum Genet.* 2007;81: 1084-97.
- 766 68. Yang Z. PAML 4: Phylogenetic analysis by maximum likelihood. *Mol. Biol. Evol.*  
767 2007;24: 1586–91.
- 768 69. Prajapati SK, Singh OP. Insights into the invasion biology of *Plasmodium vivax*.  
769 *Front. Cell. Infect. Microbiol.* 2013;3: 8.
- 770 70. Rozas J. DNA sequence polymorphism analysis using DnaSP. *Methods Mol. Biol.*  
771 *Bioinformatics DNA Seq. Anal.* 2009;537: 337–50.
- 772 71. Katoh K, Standley DM. MAFFT Multiple sequence alignment software version 7:  
773 improvements in performance and usability. *Mol. Biol. Evol.* 2013;30: 772–80.
- 774 72. Kück P, Longo GC. FASconCAT-G: extensive functions for multiple sequence  
775 alignment preparations concerning phylogenetic studies. *Front. Zool.* 2014;11: 81.
- 776 73. Stamatakis A. RAxML-VI-HPC: maximum likelihood-based phylogenetic analyses  
777 with thousands of taxa and mixed models. *Bioinformatics* 2006;22: 2688–90.
- 778 74. Jombart T. ADEGENET: a R package for the multivariate analysis of genetic markers.  
779 *Bioinformatics.* 2008;24: 1403–5.
- 780 75. Schneider ADB, Ford CT, Hostager R, Williams J, Cioce M, Çatalyürek ÜV, et al.  
781 StrainHub: a phylogenetic tool to construct pathogen transmission networks.  
782 *Bioinformatics.* 2019; btz646.
- 783 76. Lo E, Hostetler JB, Yewhalaw D, Pearson RD, Hamid MMA, Gunalan K, et al.  
784 Frequent expansion of *Plasmodium vivax* duffy binding protein in Ethiopia and its  
785 epidemiological significance. *PLOS Negl. Trop. Dis.* 2019;13: e0007222.



- 786 77. Oliveira TCD, Rodrigues PT, Menezes MJ, Gonçalves-Lopes RM, Bastos MS, Lima  
787 NF, et al. Genome-wide diversity and differentiation in new world populations of the  
788 human malaria parasite *Plasmodium vivax*. PLOS Negl. Trop. Dis. 2017;11:  
789 e0005824.
- 790 78. Neafsey DE, Galinsky K, Jiang RHY, Young L, Sykes SM, Saif S, et al. The malaria  
791 parasite *Plasmodium vivax* exhibits greater genetic diversity than *Plasmodium*  
792 *falciparum*. Nat Genet. 2012;44: 1046–50.
- 793 79. Dharia NV, Bright AT, Westenberger SJ, Barnes SW, Batalov S, Kuhlen K, et al.  
794 Whole-genome sequencing and microarray analysis of *ex vivo Plasmodium vivax*  
795 reveal selective pressure on putative drug resistance genes. Proc. Natl. Acad. Sci.  
796 USA 2010;107: 20045–50.
- 797 80. Chen J-H, Chen S-B, Wang Y, Ju C, Zhang T, Xu B, et al. An immunomics  
798 approach for the analysis of natural antibody responses to *Plasmodium vivax*  
799 infection. Mol Biosyst. 2015;11: 2354–63.
- 800 81. Shen H-M, Chen S-B, Wang Y, Xu B, Abe EM, Chen J-H. Genome-wide scans for  
801 the identification of *Plasmodium vivax* genes under positive selection. Malar. J.  
802 2017;16: 238.
- 803 82. Mascorro CN, Zhao K, Khuntirat B, Sattabongkot J, Yan G, Escalante AA, et al.  
804 Molecular evolution and intragenic recombination of the merozoite surface protein  
805 MSP-3 $\alpha$  from the malaria parasite *Plasmodium vivax* in Thailand. Parasitology.  
806 2005;131: 25–35.
- 807 83. Cunnning D, Lawton J, Jarra W, Preiser P, Langhorne J. The *pir* multigene family of  
808 *Plasmodium*: antigenic variation and beyond. Mol. Biochem. Parasitol. 2010;170: 65-  
809 73.
- 810 84. Loy DE, Plenderleithc LJ, Sundararamana SA, Liua W, Gruszczyke J, ChenG YJ,  
811 Trimbolia S, Learna GH, MacLeanc OA, Morgan ALK, Lia Y, Avittoa AN, Gilesa J,  
812 Calvignac-Spencerg S, Sachseg A, Leendertzg FH, Speedeh S, Ayoubai A, Peetersi  
813 M, Rayner JC, Tham WH, Sharp PM, Hahna BH. Evolutionary history of human  
814 *Plasmodium vivax* revealed by genome-wide analyses of related ape parasites. Proc  
815 Natl Acad Sci USA 2018;115: e8450-8459.

- 816 85. Spence PJ, Jarra W, Lévy P, Reid AJ, Chappell L, Brugat T, et al. Vector  
817 transmission regulates immune control of *Plasmodium* virulence. *Nature*. 2013;498:  
818 228–31.
- 819 86. Tachibana S-I, Sullivan SA, Kawai S, Nakamura S, Kim HR, Goto N, et al.  
820 *Plasmodium cynomolgi* genome sequences provide insight into *Plasmodium vivax*  
821 and the monkey malaria clade. *Nat Genet*. 2012;44: 1051–5.
- 822 87. Carlton JM, Adams JH, Silva JC, Bidwell SL, Lorenzi H, Caler E, et al. Comparative  
823 genomics of the neglected human malaria parasite *Plasmodium vivax*. *Nature*.  
824 2008;455: 757–63.
- 825 88. Urusova D, Carias L, Huang Y, Nicolette VC, Popovici J, Roesch C, et al. Structural  
826 basis for neutralization of *Plasmodium vivax* by naturally acquired human antibodies  
827 that target DBP. *Nat. Microbiol*. 2019;4: 1486–96.
- 828 89. Kariu T, Yuda M, Yano K, Chinzei Y. MAEBL is essential for malarial sporozoite  
829 infection of the mosquito salivary gland. *J. Exp. Med*. 2002;195: 1317–23.
- 830 90. Preiser P, Renia L, Singh N, Balu B, Jarra W, Voza T, et al. Antibodies against  
831 MAEBL ligand domains M1 and M2 inhibit sporozoite development *in-vitro*. *Infect.*  
832 *Immun*. 2004;72: 3604–8.
- 833 91. Doolan DL, Dobano C, Baird JK. Acquired immunity to malaria. *Clin. Microbiol. Rev.*  
834 2009;22: 13–36.
- 835 92. Waltmann A, Koepfli C, Tessier N, Karl S, Fola A, Darcy AW, et al. Increasingly  
836 inbred and fragmented populations of *Plasmodium vivax* associated with the  
837 eastward decline in malaria transmission across the Southwest Pacific. *PLOS Negl.*  
838 *Trop. Dis*. 2018;12: e0006146.
- 839 93. Eede PVD, D'Alessandro U, Erhart A, Thang ND, Anné J, Overmeir CV, et al. High  
840 complexity of *Plasmodium vivax* infections in symptomatic patients from a rural  
841 community in central Vietnam detected by microsatellite genotyping. *Am. J. Trop.*  
842 *Med. Hyg*. 2010;82: 223–7.
- 843 94. Liu Y, Auburn S, Cao J, Trimarsanto H, Zhou H, Gray K-A, et al. Genetic diversity  
844 and population structure of *Plasmodium vivax* in central China. *Malar. J*. 2014;13:  
845 262.

- 846 95. Jennison C, Arnott A, Tessier N, Tavul L, Koepfli C, Felger I, et al. *Plasmodium*  
847 *vivax* populations are more genetically diverse and less structured than sympatric  
848 *Plasmodium falciparum* populations. PLOS Negl. Trop. Dis. 2015;9: e0003634.
- 849 96. Koepfli C, Timinao L, Antao T, Barry AE, Siba P, Mueller I, et al. A large  
850 *Plasmodium vivax* reservoir and little population structure in the South Pacific. PLoS  
851 ONE. 2013;8: e66041.
- 852 97. Lin E, Kiniboro B, Gray L, Dobbie S, Robinson L, Laumaea A, et al. Differential  
853 patterns of infection and disease with *P. falciparum* and *P. vivax* in young Papua New  
854 Guinean children. PLoS ONE. 2010;5: e9047.
- 855 98. Koepfli C, Ross A, Kiniboro B, Smith TA, Zimmerman PA, Siba P, et al. Multiplicity  
856 and diversity of *Plasmodium vivax* infections in a highly endemic region in Papua  
857 New Guinea. PLOS Negl. Trop. Dis. 2011;5: e1424.
- 858 99. Getachew S, To S, Trimarsanto H, Thriemer K, Clark TG, Petros B, et al. Variation  
859 in complexity of infection and transmission stability between neighboring populations  
860 of *Plasmodium vivax* in southern Ethiopia. Plos One. 2015;10: e0140780.
- 861 100. Friedrich LR, Popovici J, Kim S, Dysoley L, Zimmerman PA, Menard D, et al.  
862 Complexity of infection and genetic diversity in Cambodian *Plasmodium vivax*. PLOS  
863 Negl. Trop. Dis. 2016;10: e0004526.
- 864 101. Lo E, Lam N, Hemming-Schroeder E, Nguyen J, Zhou G, Lee M-C, et al. Frequent  
865 spread of *Plasmodium vivax* malaria maintains high genetic diversity at the Myanmar-  
866 China border, without distance and landscape barriers. J. Infect. Dis. 2017;216:  
867 1254–63.
- 868 102. Abdelraheem MH, Bansal D, Idris MA, Mukhtar MM, Hamid MMA, Imam ZS, et al.  
869 Genetic diversity and transmissibility of imported *Plasmodium vivax* in Qatar and  
870 three countries of origin. Sci. Rep. 2018;8: 8870.
- 871 103. Popovici J, Friedrich LR, Kim S, Bin S, Run V, Lek D, et al. Genomic analyses  
872 reveal the common occurrence and complexity of *Plasmodium vivax* relapses in  
873 Cambodia. mBio. 2018;9: e01888-17.

874

875

## 876 **Tables**

877 **Table 1.** Information of whole genome sequences of 44 *Plasmodium vivax* isolates from  
878 Ethiopia. The European Nucleotide Archive (ENA) accession number for all files.

879

880 **Table 2.** A shortlist of 25 erythrocyte binding genes that showed signals of positive  
881 selection based on the Likelihood Ratio Test of the M1 (neutral model) and M2 models  
882 (selection model) in PAML.

883

884 **Table 3.** Transmission network metrics among study sites calculated by StrainHub.

885

## 886 **Figures**

887 **Figure 1.** An overview of the *P. vivax* sample collection locations including Arbaminch,  
888 Badowacho, Hawassa, Halaba, and Jimma in southwestern Ethiopia.

889

890 **Figure 2.** A summary representation of the *P. vivax* genome, with the outer ring as an  
891 ideogram representing the 14 nuclear chromosomes and sizes of each. The second  
892 track represented the average coverage for each chromosome among the 44 Ethiopian  
893 samples. The third track containing the gray vertical dashes represented the  
894 distribution of genes across the 14 chromosomes. The fourth track that contained the  
895 red vertical lines represented the 64 erythrocyte binding gene candidates. The fifth  
896 inner track with the light blue background represented the  $d_N/d_S$  ratio calculated by  
897 partitioning the chromosomes into genomic regions and  $d_N/d_S$  directly. The three  
898 outliers (yellow dots) represented three unknown plasmodium protein genes that were

899 detected with significant positive selection. The sixth track indicated the overall copy  
900 number variation calculated using CNVnator. Red dots represented genes with copy  
901 number variation among the Ethiopian genomes.

902

903 **Figure 3.** (A) A distribution of the nonsynonymous and synonymous mutations of each  
904 chromosome. A higher proportion of synonymous mutations was observed compared to  
905 nonsynonymous mutations. Chromosomes 7, 9, and 12 have the most mutations  
906 overall, with chromosomes 6 and 3 having the fewest number of mutations. (B) Number  
907 of mutation sites and the nucleotide diversity of 64 erythrocyte binding genes. The  
908 *PvRBP* and *PvMSP* multigene families have the highest number of polymorphic sites  
909 when compared to the others, with *PvRBP2c* the highest number of nonsynonymous  
910 and synonymous mutations, followed by *PvMSP3* and *PvMSP1*. Approximately 40% of  
911 the mutations were nonsynonymous. These genes were also indicated with the highest  
912 nucleotide diversity.

913

914 **Figure 4.** Signal of positive selection across the 14 chromosomes among all *P. vivax*  
915 samples. Genes that showed significant signal of positive selection included *STP1*,  
916 *MAEBL*, *MSP3.8*, and *PIR* gene regions. *PvMSP3.8* gene may play a role in the  
917 erythrocyte invasion. *MAEBL* is a membrane associated erythrocyte binding like protein  
918 that may have a function associated with erythrocyte invasion.

919

920 **Figure 5.** A total of 28 gene regions that were detected with copy number variation.  
921 Annotation of these genes can be found in Supplementary Table 4. Among them,

922 *PvDBP1* (PVP01\_0623800) and *PvMSP3* (PVP01\_1030900) were associated with  
923 erythrocyte invasion. Other genes that were found to have high-order copy number  
924 were *PIR* protein genes or unknown exported plasmodium proteins.

925

926 **Figure 6.** An unrooted whole genome phylogenetic tree of the 44 Ethiopian samples  
927 showing the evolution of (A) *PvDBP*; (B) *PvMSP3*; (C) *PIR* gene on chromosome 2; and  
928 (D) *PIR* gene on chromosome 11. The Ethiopian isolates were divided into three  
929 subclades. Subclade I contained samples mostly from the Arbaminch and Badowacho.  
930 Subclade II contained a mixture of isolates from Arbaminch, Halaba, Hawassa and  
931 Jimma. Subclade III contained samples from Jimma. No distinct clusters were observed  
932 between isolates with single and multiple *PvDBP*, *PvMSP3*, and *PIR* genes. These  
933 patterns suggest that these gene regions could have expanded multiply among samples  
934 at different locations.

935

936 **Figure 7.** (A) Principal component analysis plot based on the SNP information from our  
937 variant analysis. Samples obtained from Jimma were clustered together, whereas  
938 samples from Arbaminch, Badowacho, Hawassa, and Halaba were mixed together with  
939 the exception of two samples from Hawassa. This clustering pattern suggested that  
940 there was considerable genetic variation among study sites even at a small  
941 geographical scale. (B) The transmission network, created using the StrainHub  
942 program, indicated that Arbaminch was the major source of infection in Jimma, Halaba,  
943 Badowacho and Hawassa. The greatest extent of gene flow (indicated by the boldest  
944 arrow) was observed between Arbaminch and Badowacho. Even though Jimma,

945 Badowacho and Halaba are geographically in close proximity, gene flow was not  
946 intense among these sites.

947

#### 948 **Supplementary files**

949 **Supplementary Table 1.** Distribution of SNP variants in the 64 *P. vivax* erythrocyte  
950 binding gene candidates among the 44 Ethiopian genomes.

951

952 **Supplementary Table 2.** Distribution of single nucleotide polymorphism (SNP) variants  
953 across *P. vivax* chromosomes of the 44 Ethiopian genomes.

954

955 **Supplementary Table 3.** Likelihood Ratio Test results of the M1 (neutral model) and  
956 M2 models (selection model) in PAML of all the 64 erythrocyte binding gene candidates.

957

958 **Supplementary Table 4.** Gene regions that were detected with copy number variation  
959 among the 44 Ethiopian *P. vivax* isolates based on CNVnator. Among them, only two  
960 erythrocyte binding gene candidates *PvDBP1* and *PvMSP3* were detected with high-  
961 order copies.

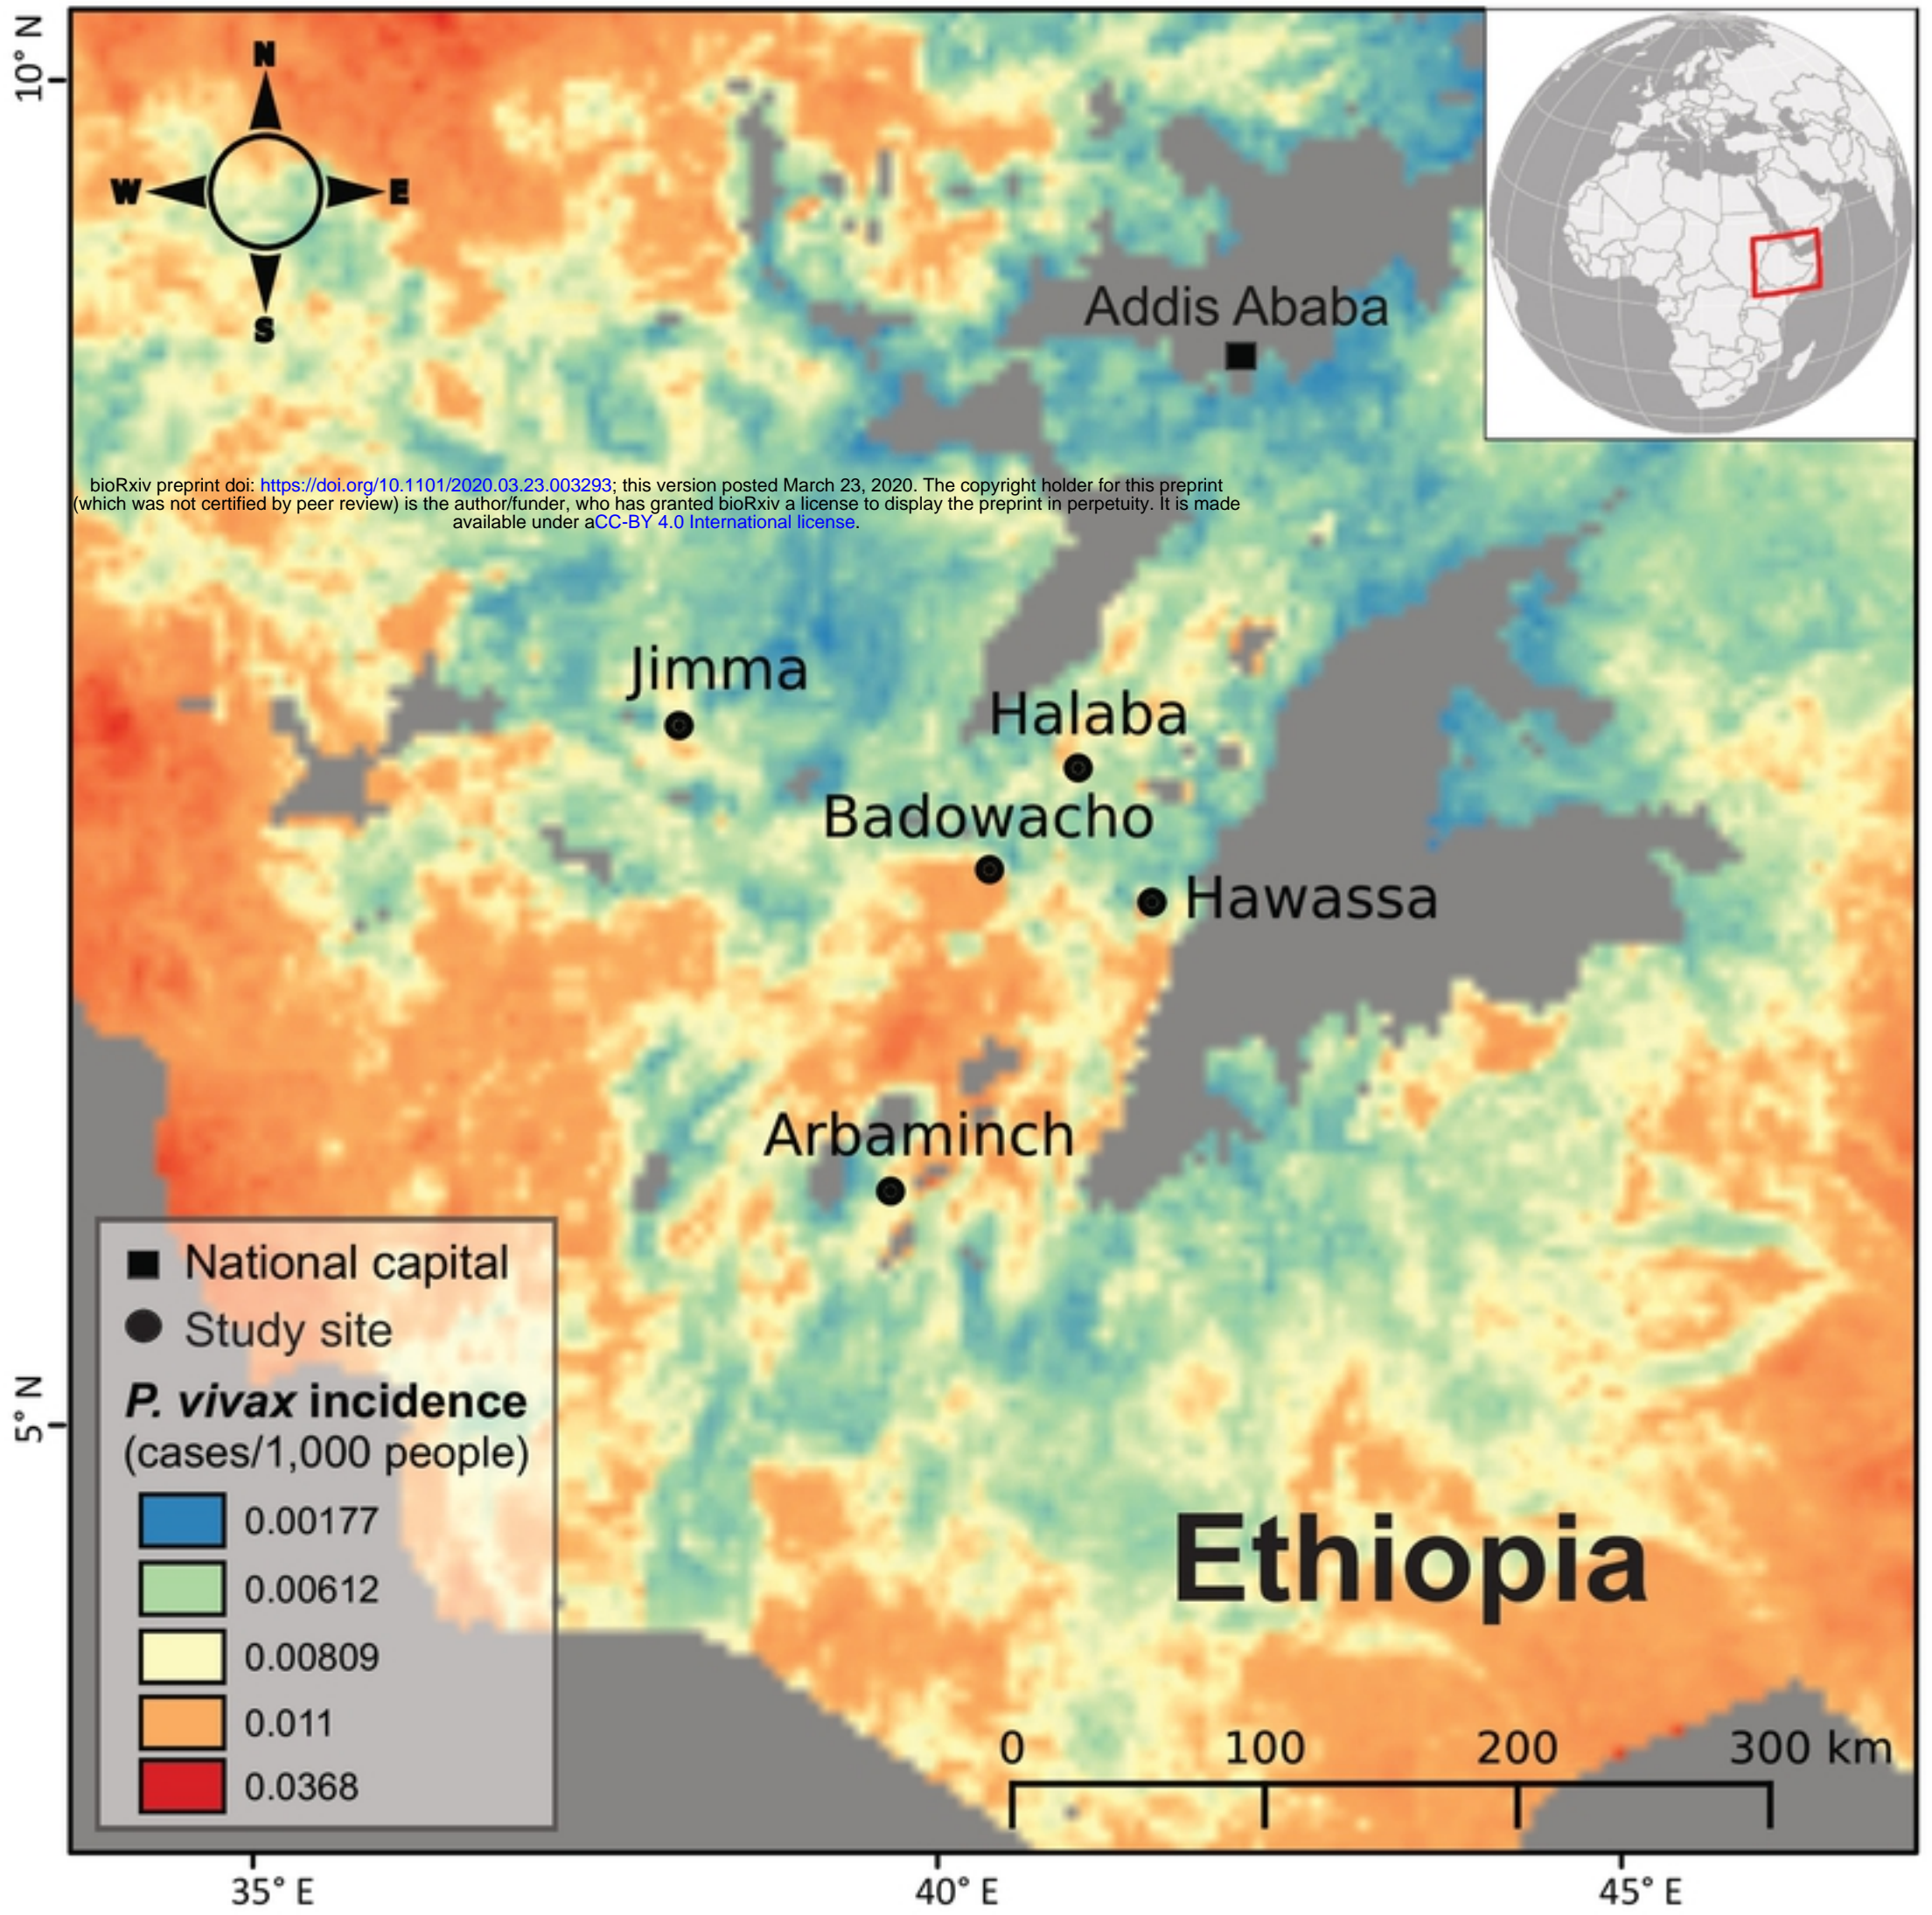



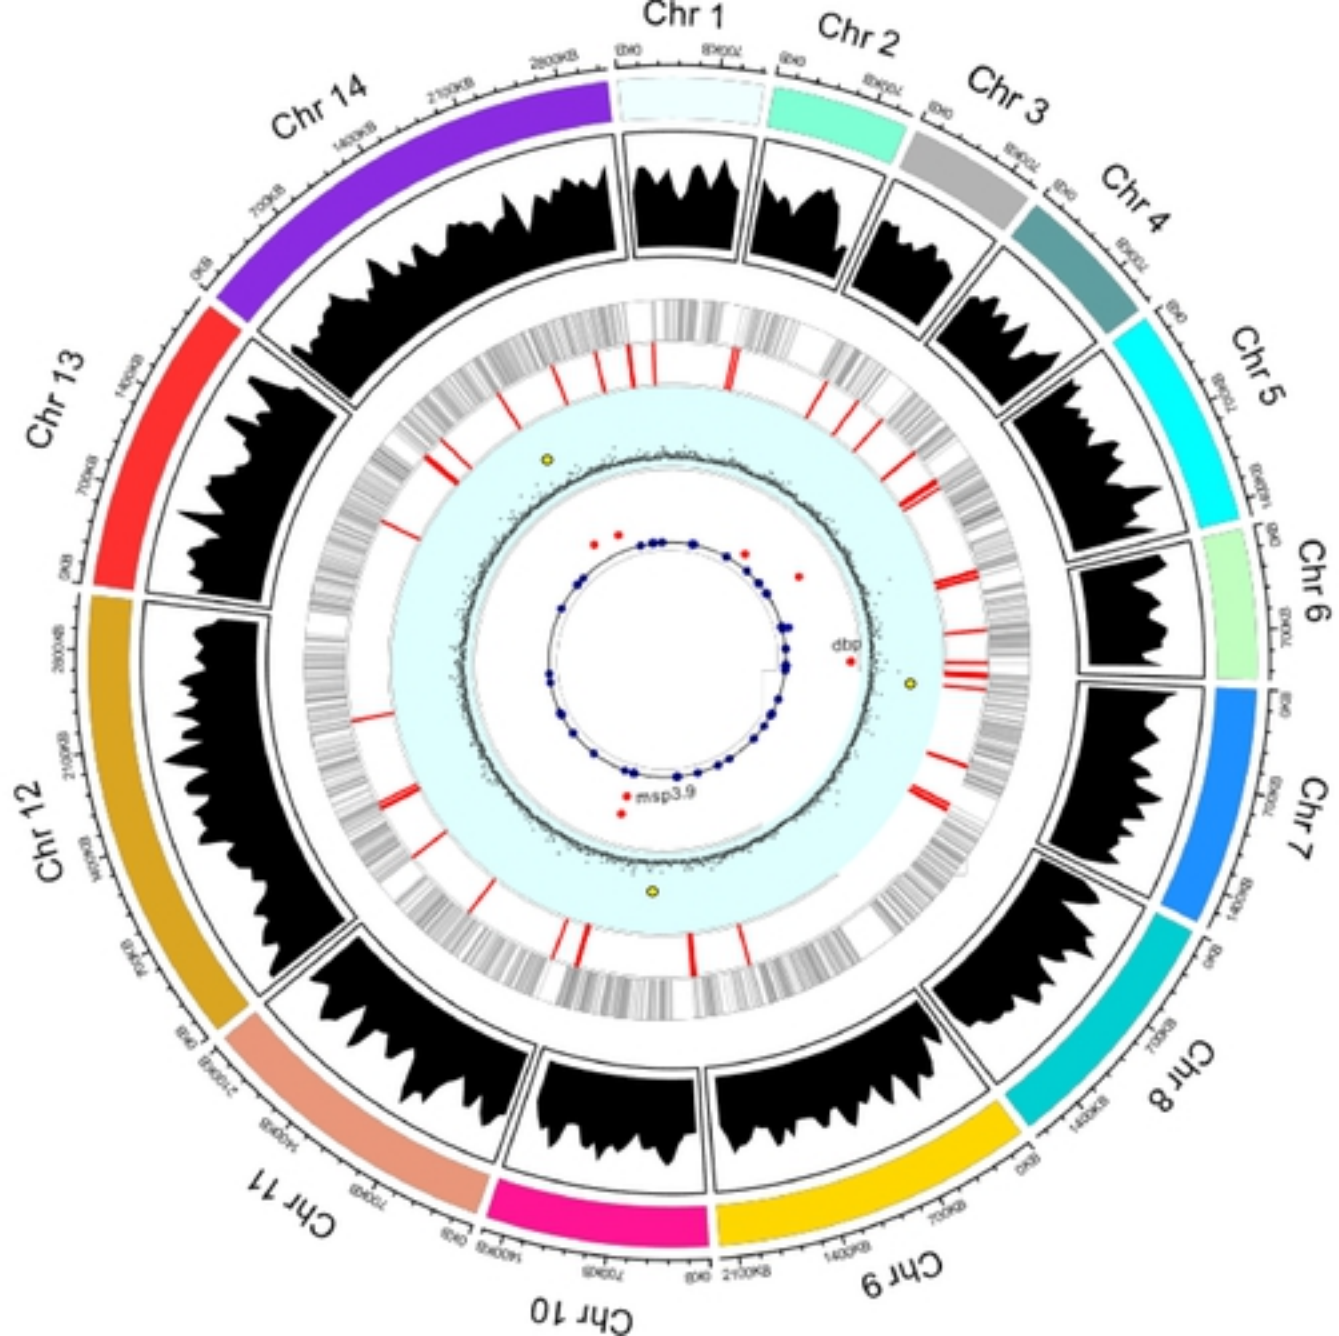

(A)

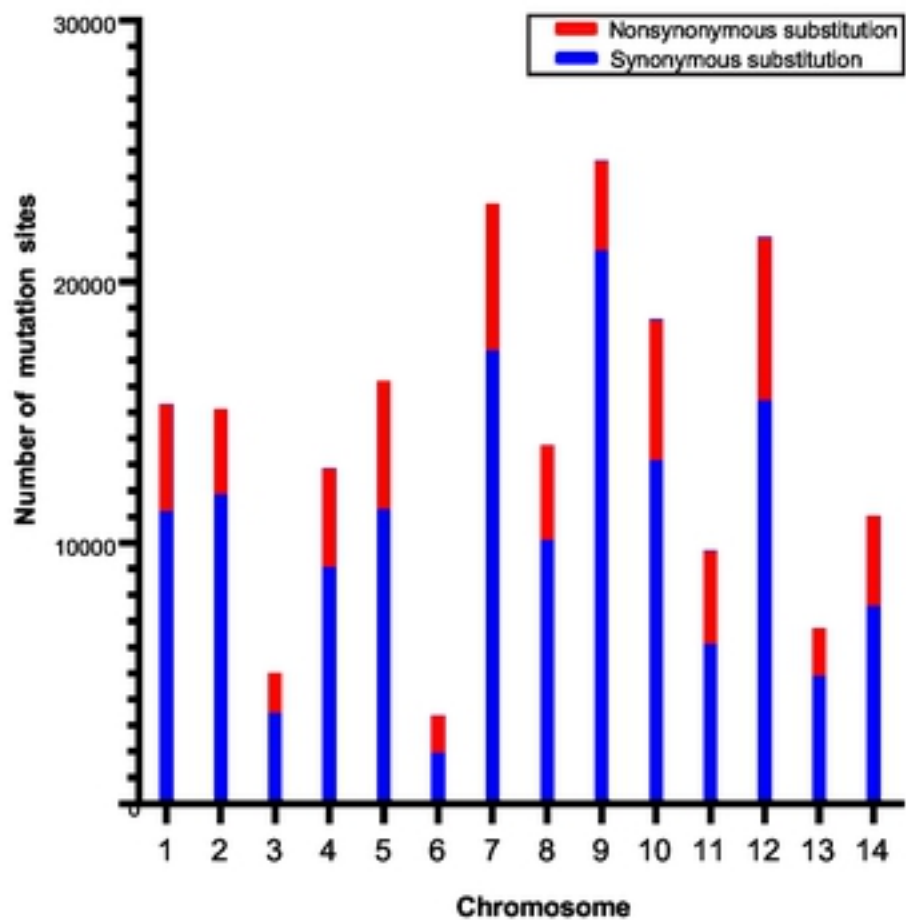

(B)

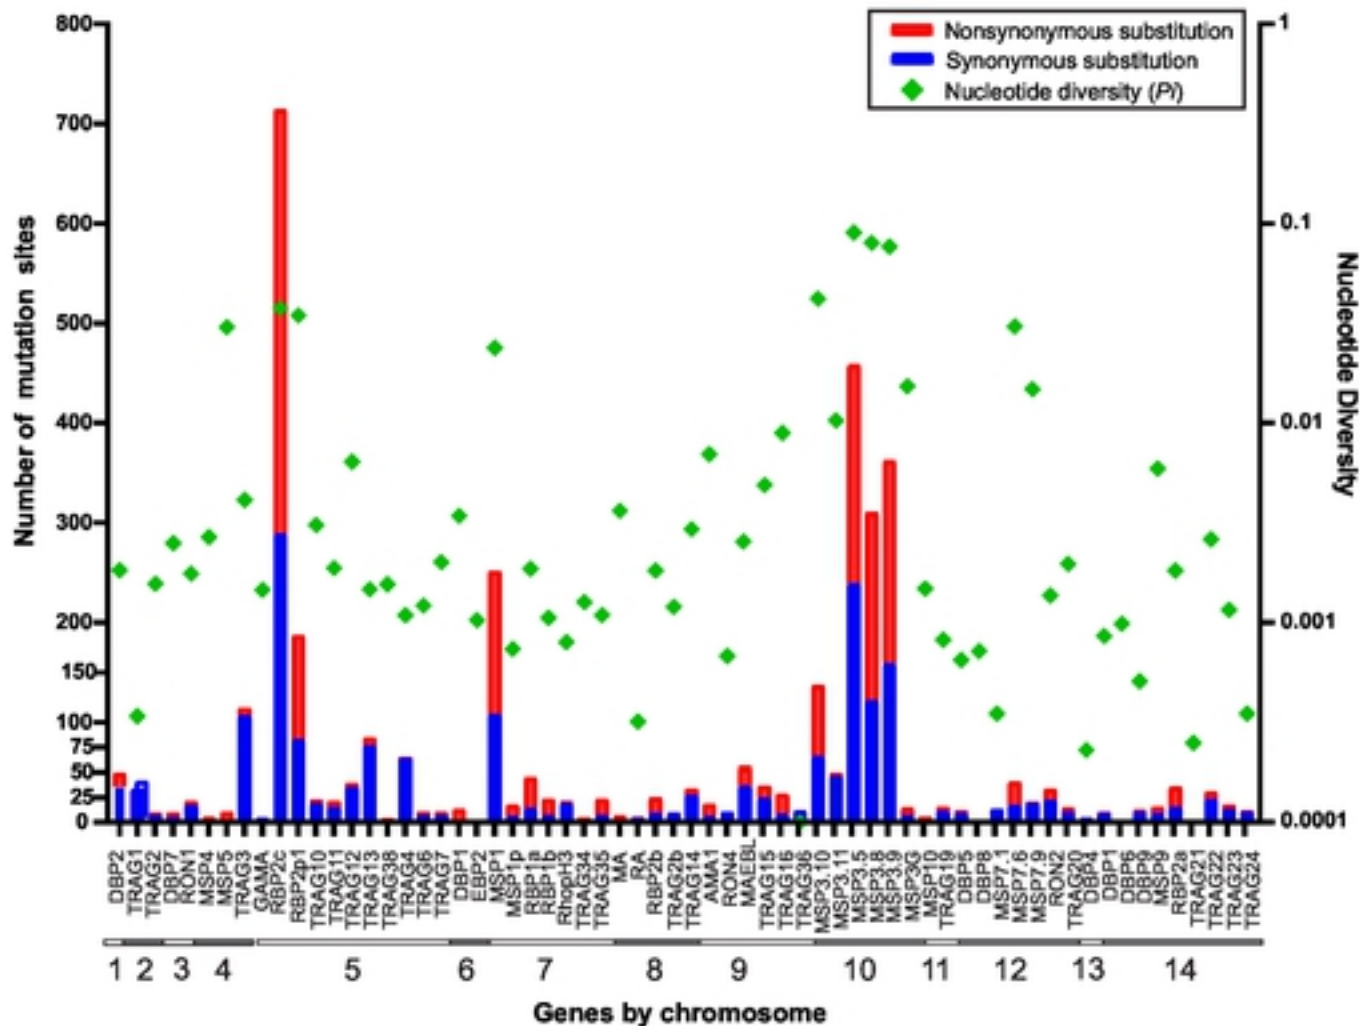

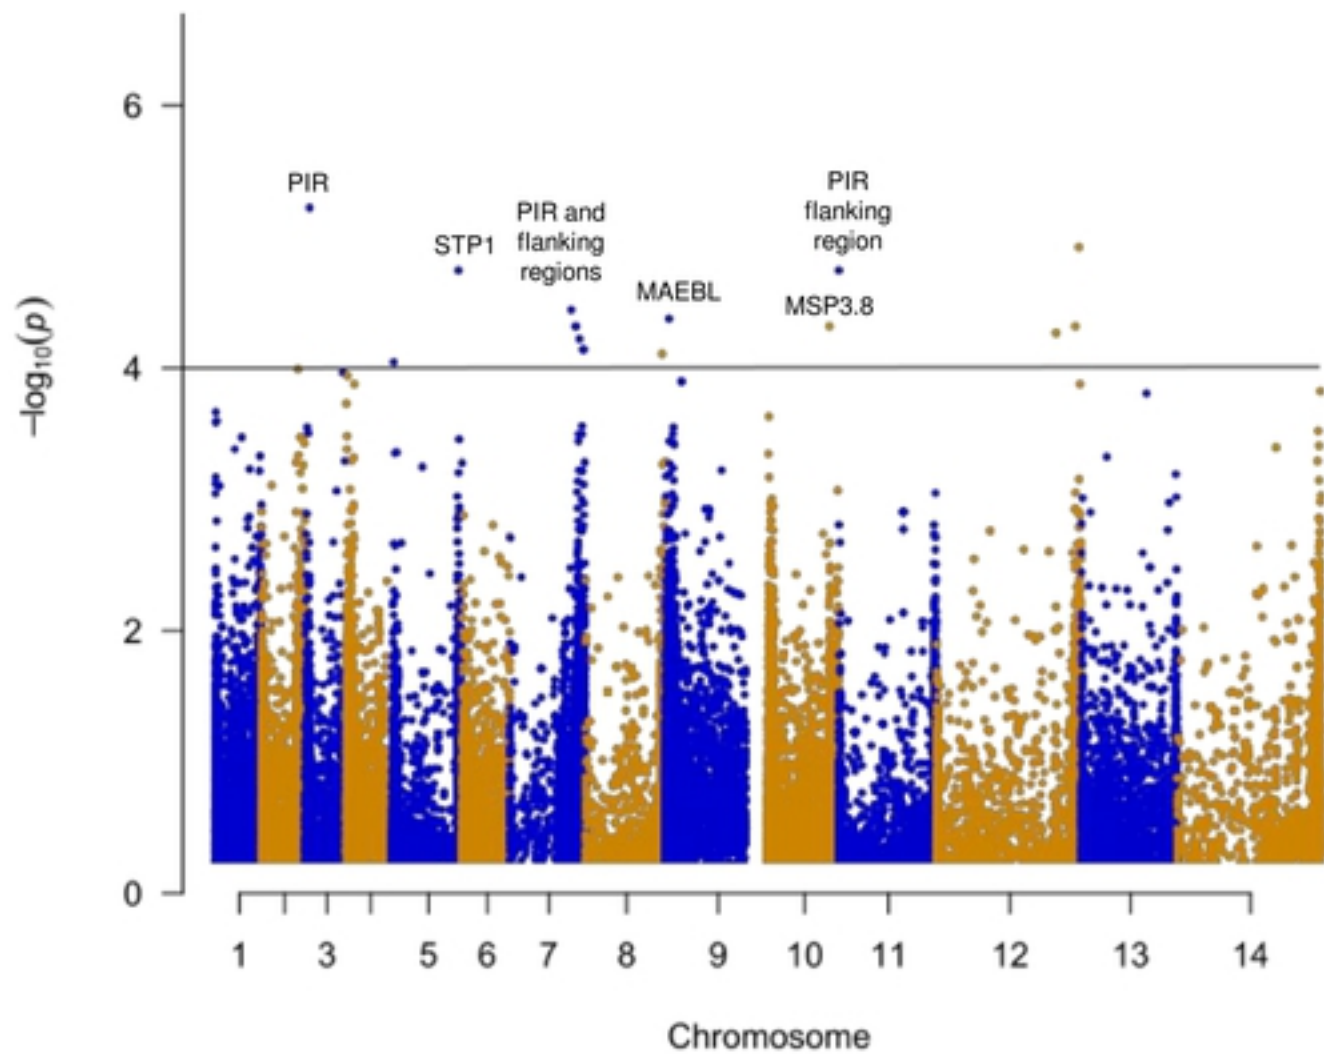

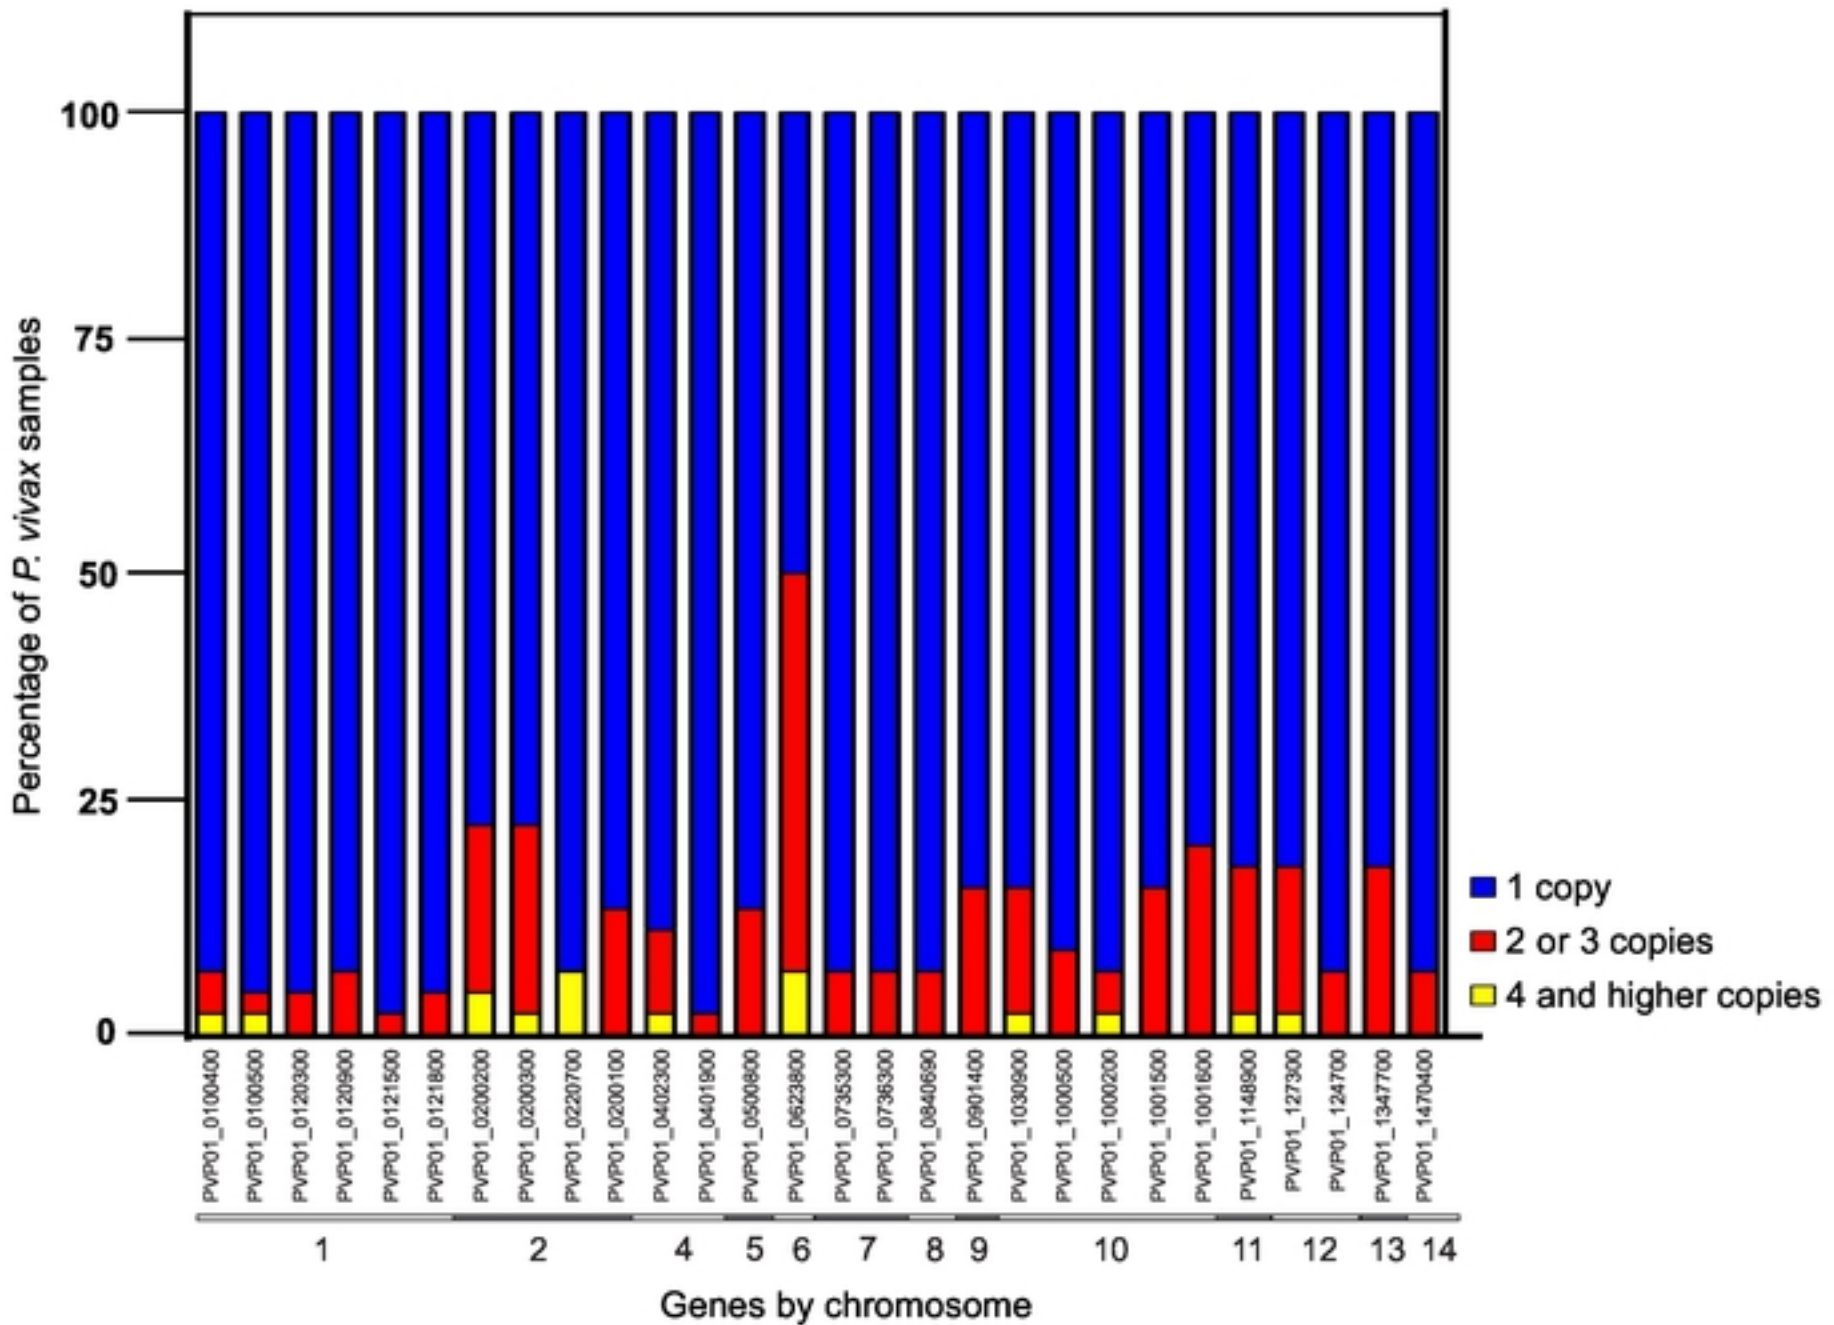

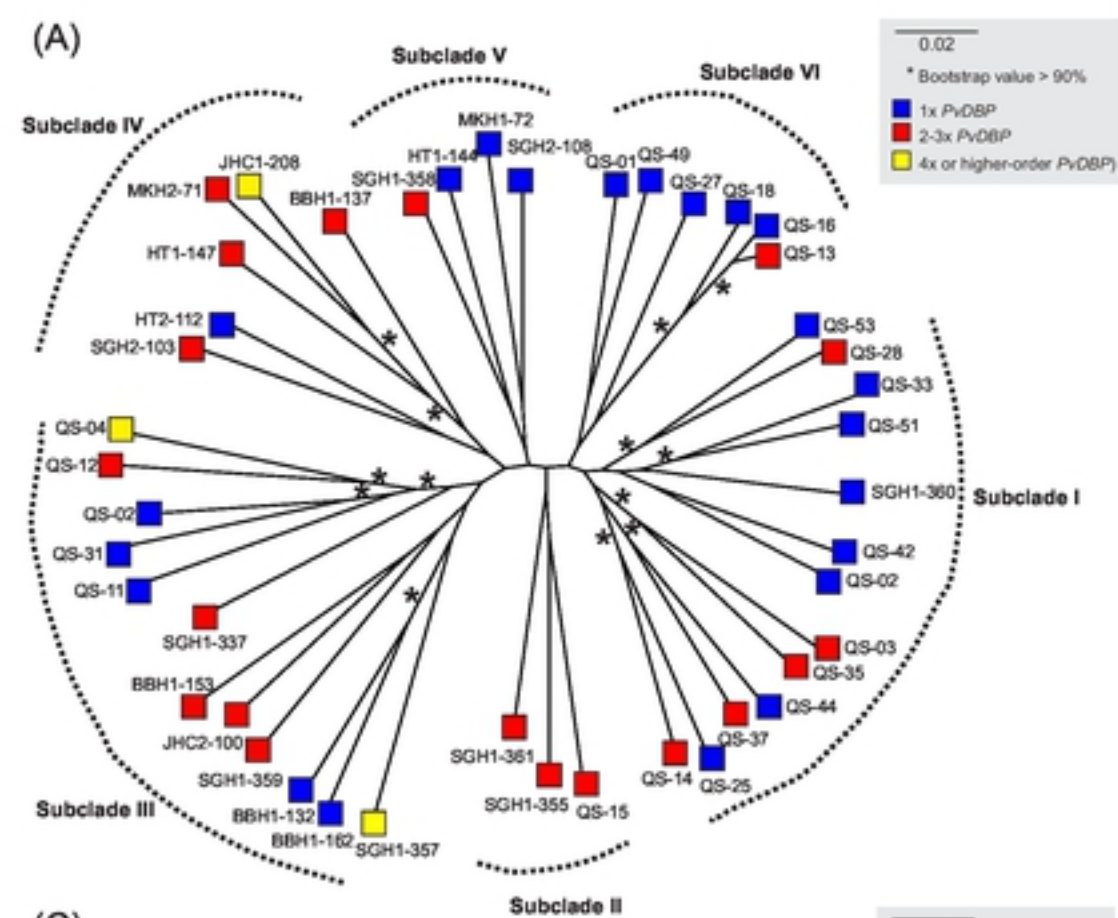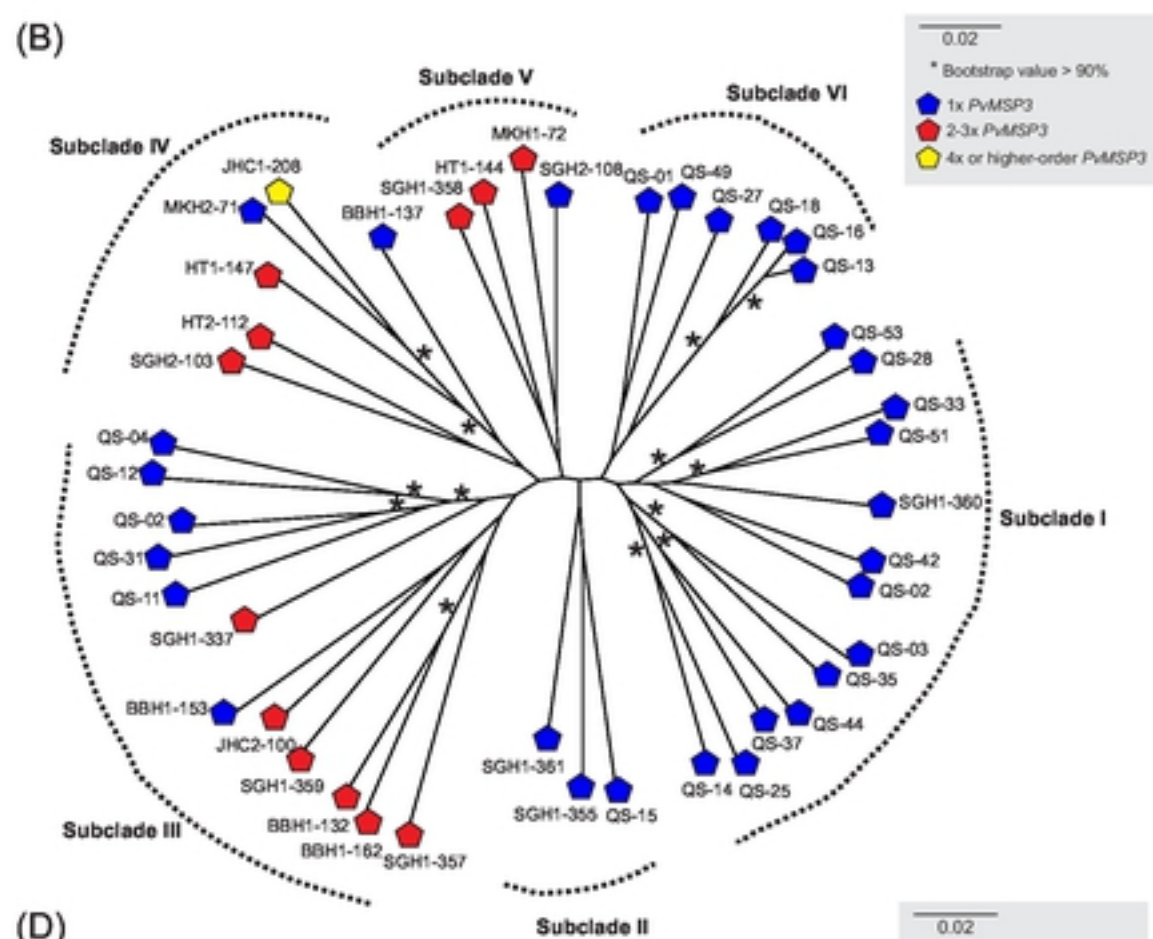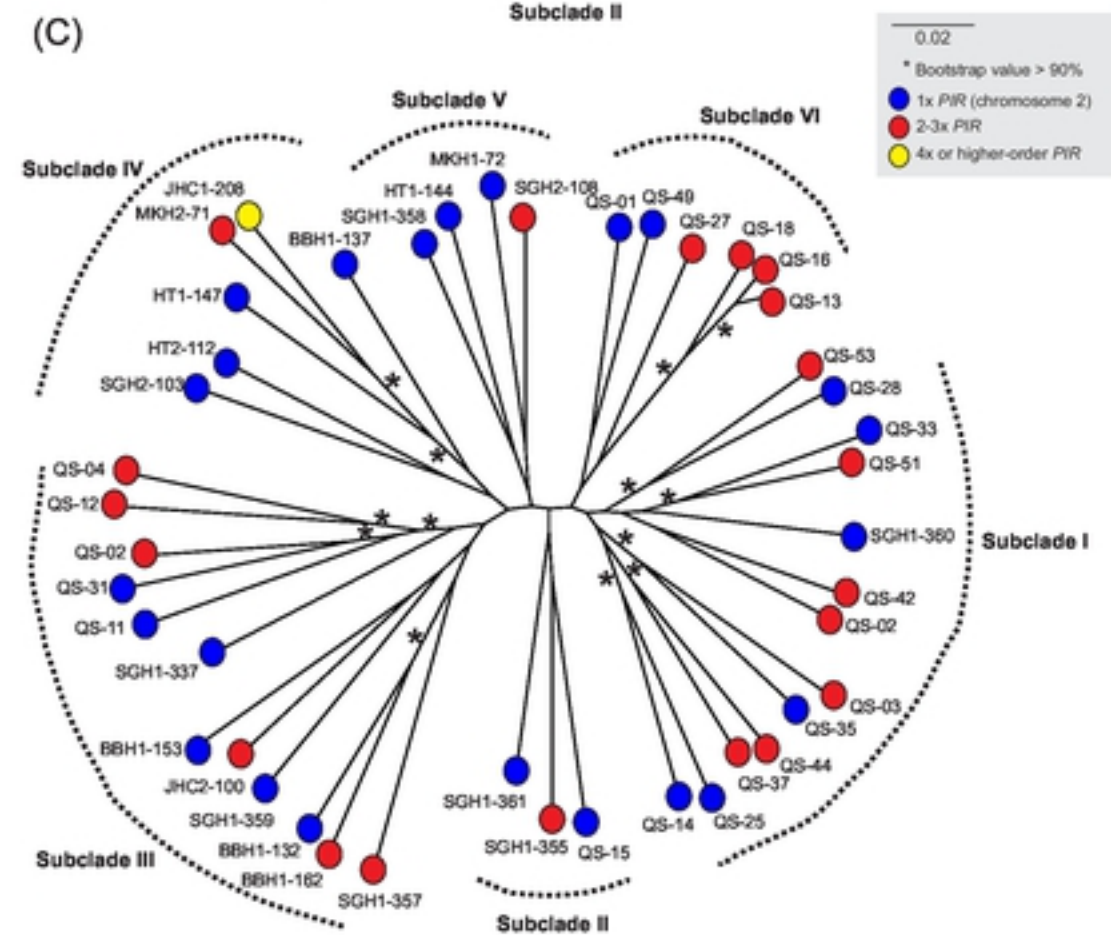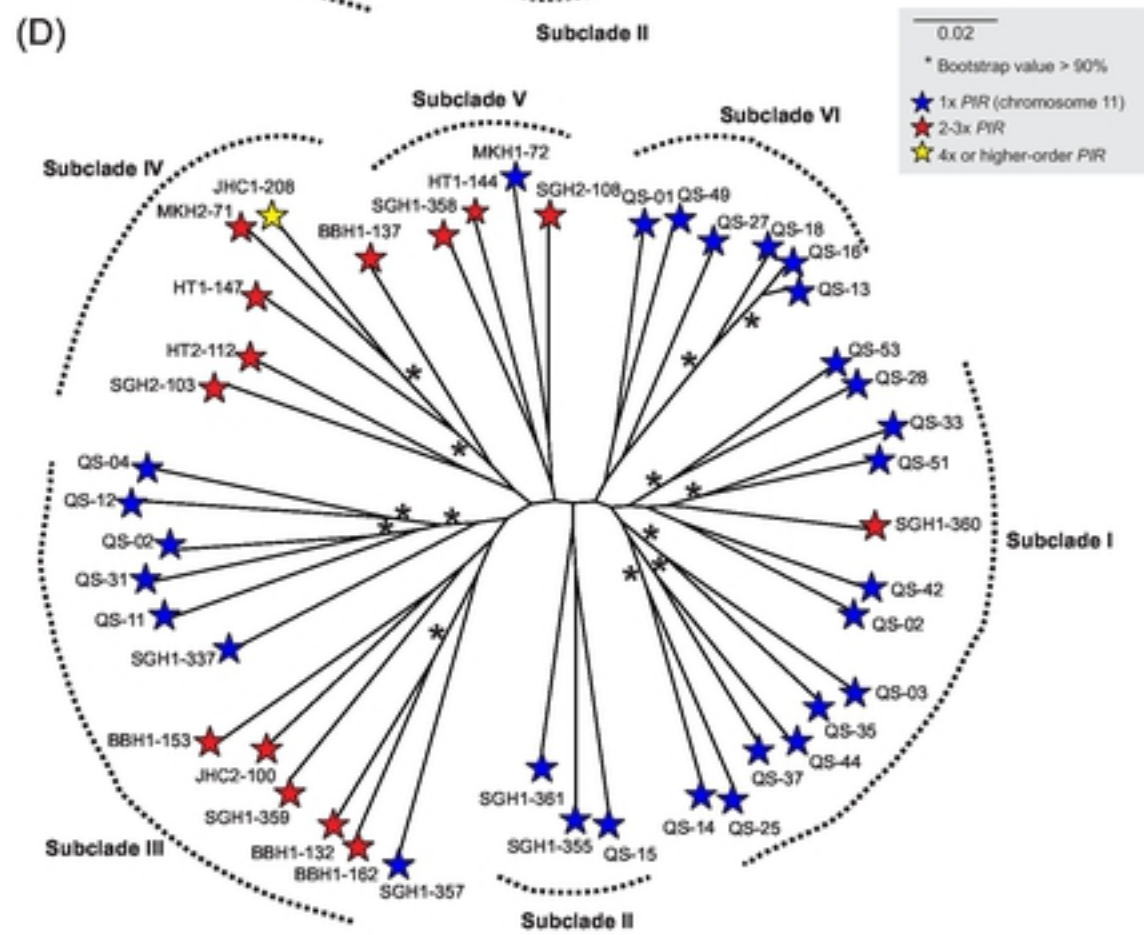

(A)

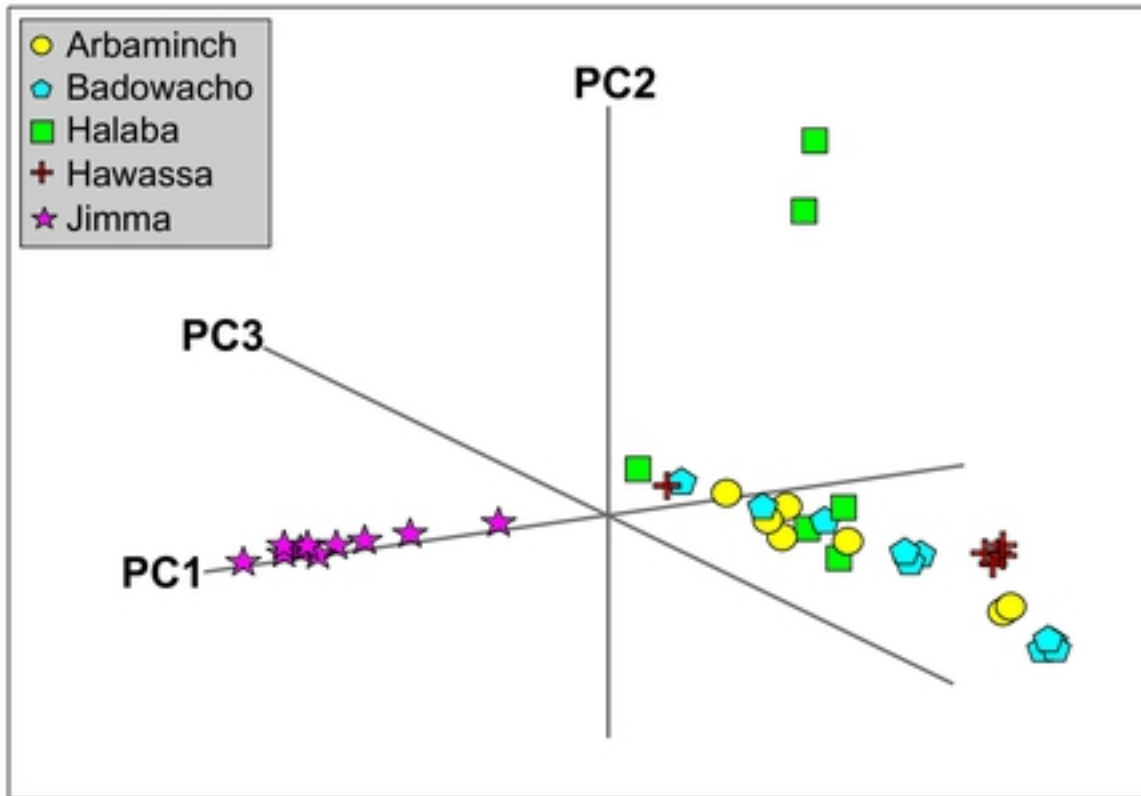

(B)

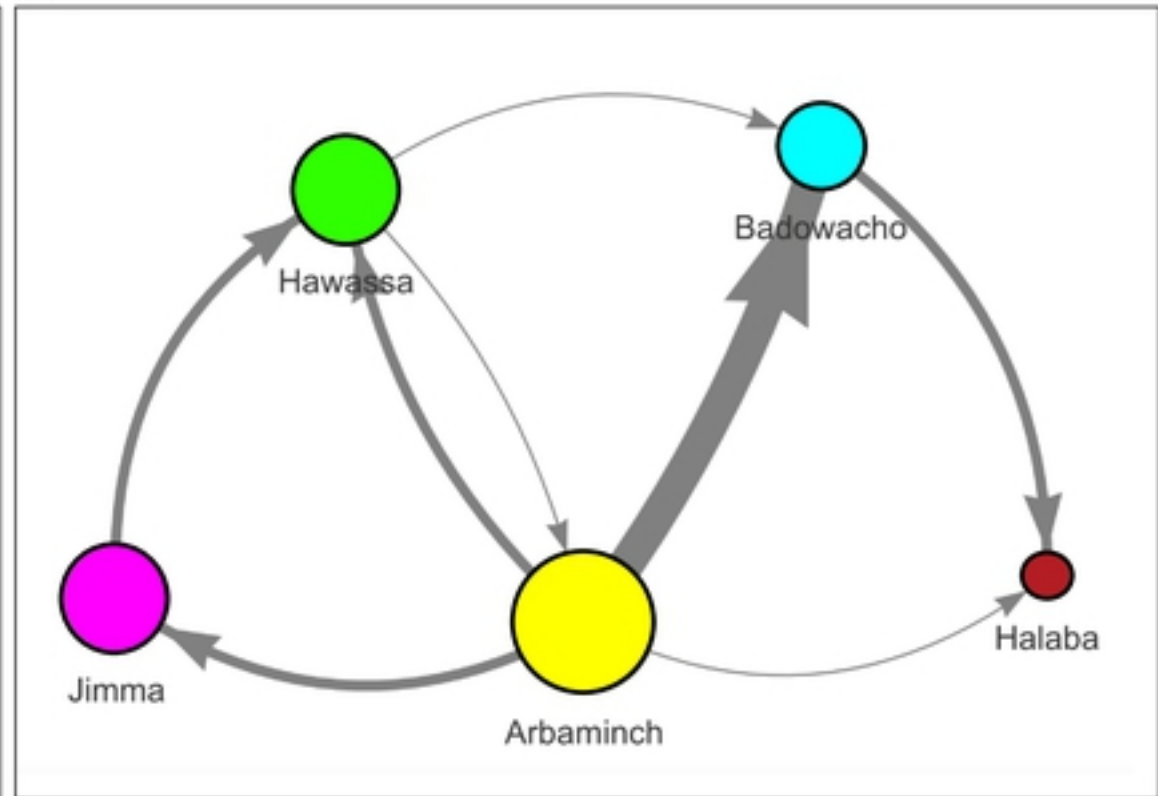

Source: https://biorxiv.org/content/10.1101/2020.03.23.003293v1.full.pdf
